1 **Mycobacterium tuberculosis reactivates HIV via exosomes mediated**  
2 **resetting of cellular redox potential and bioenergetics**

3

4 Priyanka Tyagi<sup>1,2</sup>, Virender Kumar Pal<sup>1</sup>, Sandhya Srinivasan<sup>3</sup>, and Amit  
5 Singh<sup>1\*</sup>

6 <sup>1</sup>Department of Microbiology and Cell Biology, Centre for Infectious Disease  
7 Research, Indian Institute of Science (IISc), Bangalore-12

8 <sup>2</sup>International Centre for Genetic Engineering and Biotechnology (ICGEB),  
9 New Delhi-67

10 <sup>3</sup>Vproteomics, New Delhi-16

11

12 Keywords: Exosomes, glutathione, redox potential, extracellular acidification  
13 rate, oxidative phosphorylation, roGFP

14

15

16 \* Correspondence:

17 Amit Singh, Ph.D

18 Associate Professor

19 Wellcome Trust-India Alliance Senior Fellow

20 Department of Microbiology and Cell Biology (MCBL)

21 Centre for Infectious Disease and Research (CIDR)

22 Indian Institute of Science (IISc)

23 Bangalore-12

24 [asingh@iisc.ac.in](mailto:asingh@iisc.ac.in)

25 Ph: +918022932604

26 **Abstract**

27 The synergy between *Mycobacterium tuberculosis* (*Mtb*) and HIV-1 interferes  
28 with therapy and facilitates pathogenesis of both human pathogens.  
29 Fundamental mechanisms by which *Mtb* exacerbates HIV-1 are not clear.  
30 Here, we show that exosomes secreted by macrophages infected with *Mtb*,  
31 including drug-resistant clinical strains, reactivate HIV-1 by inducing oxidative  
32 stress. Mechanistically, *Mtb*-specific exosomes realign mitochondrial and non-  
33 mitochondrial oxygen consumption rate (OCR) and modulates the expression  
34 of genes mediating oxidative stress response, inflammation, and HIV-1  
35 transactivation. Proteomics revealed the enrichment of several host factors  
36 (e.g., HIF-1 $\alpha$ , galectins, Hsp90) known to promote HIV-1 reactivation in the  
37 *Mtb*-specific exosomes. Treatment with a known antioxidant, N-acetyl  
38 cysteine, or with the inhibitors of host factors galectins and Hsp90 attenuated  
39 HIV-1 reactivation by *Mtb*-specific exosomes. Our findings uncovered new  
40 paradigms for understanding the redox and bioenergetics basis of HIV-TB co-  
41 infection, which will enable the design of effective therapeutic strategies.

42

43

44

45

46

47

48

49

50

## 51 **Introduction**

52 Tuberculosis (TB) and Human Immunodeficiency Virus/Acquired  
53 Immunodeficiency Syndrome (HIV/AIDS) jointly represent the major burden of  
54 infectious diseases in humans worldwide. HIV-1/*Mtb* co-infected patients  
55 exhibit rapid progression to AIDS and shorter survival kinetics [1]. Moreover,  
56 the risk of acquiring active TB infection increases from 10% in a lifetime to  
57 10% per year in the case of HIV-1 infected patients [2]. In 2015 alone, WHO  
58 estimated that almost 11% of 10.4 million TB patients are also infected with  
59 HIV-1, and one in every three deaths between HIV-1 infected individuals was  
60 due to TB ([http://www.who.int/hiv/topics/tb/about\\_tb/en/](http://www.who.int/hiv/topics/tb/about_tb/en/)). Epidemiological  
61 studies clearly indicate that both these human pathogens interact to  
62 accelerate disease severity and deaths [2].

63

64 Since infection with HIV-1 significantly increases the risk of TB  
65 reactivation in individuals latently infected with *Mtb* [3], a great majority of  
66 studies were focused on revealing how virus disorganizes TB granuloma [4],  
67 impaired phagosomal killing [5], and alters T-cell based immunity to  
68 exacerbates *Mtb* pathogenesis [6]. In contrast, whether *Mtb* influences exit of  
69 HIV-1 from latency and its reentry into a productive life cycle remain poorly  
70 studied. Because HIV-1 can persist in a latent state for decades and then  
71 reactivates to cause immunodeficiency, our particular interest is to understand  
72 the mechanism, if any, underlying *Mtb* induced reactivation of HIV-1 from  
73 latency. Growing body of evidences suggest that infection with *Mtb* or its  
74 component(s) (lipids and secretory proteins) promotes HIV-1 replication by  
75 regulating processes such as inflammation, MHCII processing, Toll-Like

76 Receptors (TLRs) signaling, CXCR4/CCR5 expression, proinflammatory  
77 cytokines/chemokines production, and activating transcriptional regulators  
78 (NF- $\kappa$ B, NFAT) of the long-terminal repeats (LTRs) of HIV [7-13].  
79 Contradictory evidences showing inhibition of HIV-1 replication by *Mtb*  
80 complicates our understanding of how two human pathogens interact at the  
81 molecular level [14, 15]. Despite this, research specifically addressing how  
82 *Mtb* modulates HIV latency and reactivation is, however, quite scarce. In this  
83 context, reactive oxygen species (ROS) and modulation of central metabolism  
84 are considered to be one of the main mechanisms regulating HIV-1  
85 replication, immune dysfunction, and accelerated progression to AIDS [16].  
86 Deeper studies in this direction revealed an important role for a major cellular  
87 antioxidant, glutathione (GSH) [17]. Low GSH levels in HIV patients have  
88 been shown to induce provirus transcription by activation of NF $\kappa$ B, apoptosis  
89 of CD4 T cells, and depletion of CD4 T cells [18]. Consequently,  
90 replenishment of GSH is considered as a potential supplement to highly active  
91 antiretroviral therapy (HAART) [19]. Recently, we have reported subtle  
92 changes in the intracellular and subcellular redox potential of GSH ( $E_{GSH}$ )  
93 modulates HIV-1 replication cycle [20]. We discovered that oxidative stress  
94 caused by a marginal increase in intracellular  $E_{GSH}$  (25 millivolts [mV]) is  
95 sufficient to trigger HIV-1 reactivation from latently infected cells, raising the  
96 potential of targeting HIV-1 latency by the modulators of cellular GSH  
97 homeostasis [20]. Interestingly, markers of oxidative stress such as ROS/RNS  
98 and lipid peroxidation have been shown to be elevated in active TB patients  
99 [21]. Specifically, serum/cellular GSH was either depleted or oxidized in  
100 human TB patients and in the lungs of guinea pigs infected with *Mtb* [21, 22].

101 Treatment with GSH precursor, N-acetyl cysteine (NAC), reversed oxidative  
102 stress to reduce bacterial survival and tissue damage in guinea pigs [22].  
103 Additionally, *Mtb* infection has recently been shown to influence carbon flux  
104 through glycolysis and TCA cycle in infected macrophages [23]. This, along  
105 with the recognized role of GSH homeostasis and glycolysis in HIV infection,  
106 indicates that the two pathogens might synergies via affecting redox signaling  
107 and metabolic phenotypes of the host. We explored this connection and  
108 investigated if *Mtb* induces variation in the intracellular  $E_{GSH}$  and bioenergetics  
109 to induce HIV-1 reactivation program. We anticipate that such a study has the  
110 potential to overcome many of the deficiencies in our understanding of the  
111 metabolic basis of HIV-TB co-infection and may enable high throughput  
112 screen to identify small molecule modulators of redox/central metabolism to  
113 potentiate the intervention strategies against HIV-TB co-infection.

114

115 In this study, we showed that macrophages infected with virulent *Mtb*,  
116 including multi-drug resistant (MDR) and extensively drug-resistant (XDR)  
117 clinical strains, release exosomes to induce substantial oxidative stress in  
118 neighboring non-infected macrophages (bystander). Taking cues from these  
119 findings, we showed that *Mtb* exploits the exosome-based mechanism to  
120 communicate and reactivate latent HIV-1 from monocytic (U1) and  
121 lymphocytic (J-Lat) cells. Mechanistically, *Mtb* specific exosomes alter gene  
122 expression, redox metabolism, and bioenergetics of latent cells to promote  
123 HIV-1 reactivation. Proteomic analysis of exosomes indicates that *Mtb*  
124 infection transports several proteins associated with host cellular pathways

125 known to reactivate HIV-1 by perturbing redox metabolism, inflammation, and  
126 immune response.

127

## 128 **Results**

### 129 ***Mtb* infection induces oxidative stress in bystander macrophages**

130 We exploited a non-invasive biosensor (Grx1-roGFP2) of GSH redox  
131 potential ( $E_{GSH}$ ) [24] to measure dynamic changes in the redox physiology of  
132 human macrophages (U937) upon infection with a virulent strain of *Mtb*  
133 (H37Rv). GSH is the most abundant low molecular weight thiol produced by  
134 mammalian cells, therefore,  $E_{GSH}$  measurement provides a reliable and  
135 sensitive indicator of the cytoplasmic redox state of macrophages [20, 24].  
136 The biosensor shows an increase in the fluorescence excitation ratio at  
137 405/488 nm upon oxidative stress, whereas a ratiometric decrease is  
138 associated with reductive stress (Fig. 1A). The ratiometric changes can be  
139 easily fitted into the modified Nernst equation to precisely calculate  $E_{GSH}$  [24].

140

141

142 U937 monocytes expressing cytosolic Grx1-roGFP2 (U937/Grx1-  
143 roGFP2) were differentiated to macrophages using PMA and infected with  
144 *Mtb* H37Rv (Fig. 1B). At various time-points post-infection, 405/488 ratios  
145 were measured by flow cytometry to calculate intracellular  $E_{GSH}$  as described  
146 [20]. We first confirmed the response of biosensor to a well-known oxidant  
147 cumene hydroperoxide (CHP) and a cell-permeable thiol-reductant  
148 dithiothreitol (DTT). As expected, the treatment of U937/Grx1-roGFP2 with  
149 CHP increases 405/488 ratio, which corresponds to  $E_{GSH}$  of -240 mV and  
150 treatment with a cell-permeable thiol-reductant dithiothreitol (DTT) decreases

151 405/488 ratio, which corresponds to  $E_{GSH}$  of -320 mV. (Fig. 1C-F). Next, we  
152 examined the biosensor response upon infection with *Mtb* H37Rv. Uninfected  
153 U937/Grx1-roGFP2 cells exhibit highly reduced cytoplasm (405/488 ratio ~  
154 0.1-0.15 over-time;  $E_{GSH} = -301 \pm 2$  mV) (Fig. 1G). In contrast, *Mtb* infection  
155 gradually increases the biosensor oxidation ratio over time, which results in an  
156 ~ +20 mV shift in  $E_{GSH}$  ( $-282 \pm 2$  mV) at 24 h p.i. (Fig. 1G).

157

158 In order to investigate the relative contribution of infected versus  
159 uninfected cells on  $E_{GSH}$  of macrophage population, we assessed the  
160 biosensor response of bystander and *Mtb* infected U937 macrophages. *Mtb*  
161 cells stained with a lipophilic dye PKH26 were used to infect U937/Grx1-  
162 roGFP2 at moi 10. About  $42.75\% \pm 4.05$  of U937/Grx1-roGFP2 cells were  
163 infected with PKH26-labeled *Mtb* (PKH<sup>+</sup>/GFP<sup>+</sup>) (Fig. 2A). Interestingly,  
164 bystander U937 (PKH<sup>-</sup>/GFP<sup>+</sup>) showed a greater 405/488 ratio as compared  
165 to infected cells (PKH<sup>+</sup>/GFP<sup>+</sup>) at each time point tested (Fig. 2B). At 24 h  
166 p.i.,  $E_{GSH}$  of bystander cells was  $-276 \pm 2$  mV as compared to  $E_{GSH}$  of  $-286 \pm 2$   
167 mV in the case of *Mtb* infected cells (Fig. 2B). This suggests that the redox  
168 physiology of infected and bystander macrophages are distinctly affected  
169 during *Mtb* infection. Additionally, U937/Grx1-roGFP2 cells infected with *Mtb*  
170 genetically expressing red-fluorescent protein (RFP:tdTomato) confirmed a  
171 higher 405/488 ratio of bystander cells (RFP<sup>-</sup>/GFP<sup>+</sup>) as compared to  
172 infected cells (RFP<sup>+</sup>/GFP<sup>+</sup>) (Fig. 2C). Infection of U937/Grx1-roGFP2 with  
173 PKH labeled heat-killed *Mtb* (*Hk-Mtb*) did not increase oxidative stress in the  
174 infected or bystander cells (Fig. 2D), indicating that processes such as  
175 secretion of bioactive lipids or proteins are the likely modulators of

176 intramacrophage  $E_{GSH}$ . The secretory proteins of Esx-1 family of *Mtb* are  
177 known to induce oxidative stress in the infected macrophages [25]. Agreeing  
178 to this, the *Mycobacterium bovis* (BCG) strain, defective in secreting Esx-1  
179 proteins, elicits marginal degree of biosensor oxidation in both infected or  
180 bystander U937/Grx1-roGFP2 (Fig. 2E). Viable *Mtb*, *Hk-Mtb*, and BCG strains  
181 were internalized to a comparable degree by U937 (Fig. S1), precluding the  
182 influence of variations in the initial uptake rates on the  $E_{GSH}$  of macrophages.

183

184         Since HIV-1 infected individuals are frequently co-infected with the drug-  
185 resistant strains of *Mtb* [26, 27], we assessed the impact of single drug-  
186 resistant (SDR; BND320), multi-drug resistant (MDR; Jal2261 and Jal 1934)  
187 and extensively drug-resistant (XDR; Myc 431) strains of *Mtb* isolated from  
188 patients [28] on  $E_{GSH}$  of U937. Infection with BND320 induces an increase in  
189 405/488 ratio of infected and bystander macrophages to a degree comparable  
190 to *Mtb* H37Rv (Fig. 2F). However, infection with MDR and XDR strains  
191 stimulated a significantly higher oxidative shift in  $E_{GSH}$  of bystander cells as  
192 compared to infected U937 (Fig. 2G, 2H, and 2I), and also as compared to  
193 bystander cells in case of infection with *Mtb* H37Rv (compare Fig 2B with Fig  
194 2G, 2H, and 2I). Altogether, these results confirm that infection with *Mtb*  
195 drives changes in  $E_{GSH}$  of infected and bystander U937 cells and that clinical  
196 drug-resistant isolates are potent inducers of oxidative stress in macrophages.

197

### 198 **Reactivation of HIV-1 upon co-culturing with *Mtb* Infected macrophages**

199         HIV-1 infects multiple immune cells including macrophages,  
200 lymphocytes, and dendritic cells, whereas macrophages are the major host



201 cells for *Mtb*. Therefore, how *Mtb* infected macrophages communicates with  
202 HIV-1 infected cells of different origin remain unknown. The induction of  
203 oxidative stress in bystander cells raised a possibility that *Mtb* infected  
204 macrophages could reactivate virus by modulating redox physiology of  
205 neighboring cells chronically infected with HIV-1. This communication can be  
206 mediated either by direct cell-cell contact or often by bioactive soluble factors  
207 (e.g., cytokines). To assess these possibilities, we set up a co-culturing  
208 experiment wherein *Mtb* infected U937 macrophages were cultured with J-Lat  
209 10.6 lymphocytes latently infected with HIV-1. The latent HIV-1 can be  
210 reactivated by various stimuli such as phorbol esters [12-  
211 Otetradecanoylphorbol-13-acetate (TPA)], prostratin, and TNF $\alpha$  [29]. The  
212 integrated HIV-1 genome encodes GFP, which allows precise quantification of  
213 HIV-1 reactivation using flow cytometry. As expected, pretreatment of J-Lat  
214 with TNF $\alpha$  (10 ng/ ml) induced significant HIV-1 reactivation, which translated  
215 into a greater percentage of GFP+ cells over time (Fig. S2A). Co-culturing of  
216 *Mtb* infected U937 with J-Lat also showed a time-dependent increase in GFP+  
217 cells, indicating HIV-1 reactivation (Fig. S2A). However, co-culturing with  
218 either uninfected or *Hk-Mtb* infected U937 significantly attenuated the  
219 induction of GFP from J-Lat cells (Fig. S3A). As an additional verification, we  
220 examined the effect of co-culturing on a monocytic cell line (U1) of HIV-1  
221 latency [30]. The U1 shows basal expression of two integrated copies of HIV-  
222 1 genome, but gene expression and viral replication can be reactivated by  
223 various stimuli such as PMA, TNF $\alpha$ , IFN- $\gamma$ , GM-CSF [31]. We tracked HIV-1  
224 reactivation by immuno-staining for HIV-1 core protein, p24 and quantified  
225 using flow cytometer. First, we confirmed that PMA treatment reactivated HIV-

226 1 from U1 in a time-dependent manner (Fig. S3B). Second, similar to J-Lat  
227 findings, HIV-1 reactivation was readily observed upon co-culturing of U1 cells  
228 with U937 infected with *Mtb*, whereas co-culturing with uninfected U937  
229 macrophages or *Hk-Mtb* infected U937 macrophages partially reactivated  
230 HIV-1 (Fig. S2B).

231

232 To examine if this may be related to the release of soluble factors from  
233 *Mtb* infected macrophages, we treated J-LAT cells with culture supernatants  
234 derived from *Mtb* infected U937 macrophages at 24 h p.i. A time-dependent  
235 increase in GFP expression was induced by the addition of supernatant (50%,  
236 v/v) from *Mtb* infected U937 on to J-Lat cultures (Fig. 3A). Culture supernatant  
237 (50%, v/v) from uninfected U937 or *Hk-Mtb* infected macrophages showed  
238 diminished expression of GFP from J-Lat (Fig. 3A). Similar to J-Lat, treatment  
239 of U1 cells with the supernatant derived from *Mtb* infected U937 macrophages  
240 reactivated HIV-1 to the highest level as compared to supernatant from *Hk-*  
241 *Mtb* infected or uninfected U937 (Fig. 3B). Marginal reactivation of HIV-1 by  
242 the supernatant of uninfected U937 macrophage is perhaps due to the known  
243 effect of PMA (used as a differentiating agent) on proinflammatory cytokines  
244 secretion in the extracellular milieu [32]. Agreeing to this, supernatant from  
245 undifferentiated U937 monocytes completely failed to resuscitate HIV-1 from  
246 U1 and J-LAT (Fig. 3A and 3B). To decisively rule out the influence of PMA on  
247 HIV-1 reactivation in our assays, we infected RAW264.7 murine macrophages  
248 with *Mtb* and collected supernatant at 24 h p.i. As a control, the supernatant  
249 was also collected from the uninfected RAW264.7 macrophages. Addition of  
250 the supernatant from uninfected RAW264.7 was completely ineffective in HIV-

251 1 reactivation from U1 cells, whereas supernatant derived from *Mtb* infected  
252 RAW264.7 was fully potent in reactivating HIV-1 (Fig. 3C).

253

254 **Exosomes derived from *Mtb* infected macrophages and mice reactivate**  
255 **HIV-1**

256 Exosomes released from *Mtb* infected macrophages have been shown  
257 to direct NFκB-mediated production of proinflammatory cytokines and  
258 chemokines from bystander cells [33]. Since HIV-1 reactivation is  
259 fundamentally dependent on NFκB and proinflammatory  
260 cytokines/chemokines [34], we tested the role of exosomes in HIV-1  
261 reactivation. To begin understanding this, we infected U937 and RAW264.7  
262 macrophages with *Mtb* and treated infected macrophages with a well-known  
263 inhibitor of exosome secretion, GW4869 [35]. At 24 h post-treatment with  
264 GW4869, we collected supernatant and performed HIV-1 reactivation in J-Lat  
265 and U1 as described earlier. As shown in figure 3D and 3E, HIV-1 reactivation  
266 in J-Lat and U1 was observed in case of supernatant derived from *Mtb*  
267 infected macrophages, whereas a significant reduction in HIV-1 reactivation  
268 was detected in case of supernatant derived from GW4869 treated *Mtb*  
269 infected macrophages (Fig. 3D and 3E). Furthermore, we have taken a third  
270 cell line (J1.1 lymphocyte) latently infected with HIV-1 [36] and confirmed that  
271 only the supernatant derived from *Mtb* infected macrophages reactivated HIV-  
272 1 (as shown by *gag* qRT-PCR) as compared to supernatant from uninfected,  
273 *Hk-Mtb*, and GW4869 treated macrophages (Fig. 3F). These results suggest  
274 a role for exosomes secreted by *Mtb* infected macrophages in reactivating  
275 HIV-1. Since supernatant-derived from *Mtb* infected U937 and RAW264.7

276 macrophages resulted in an identical degree of HIV-1 reactivation, further  
277 experiments are conducted using RAW264.7 cells only. This was necessary  
278 to rule out any artifactual influence of PMA used to differentiate U937  
279 monocytes prior to infection with *Mtb*. Furthermore, exosomes derived from  
280 *Mtb* infected RAW264.7 have been shown to possess immune-modulatory  
281 properties comparable to exosomes isolated from the serum of *Mtb* infected  
282 mice or humans [37].

283

284 We infected RAW264.7 with *Mtb* H37Rv, and at 24 h p.i., exosomes  
285 were isolated. Transmission electron microscopy (TEM) confirmed the size of  
286 exosomes to be 80-150 nm [n= 100] (Fig. 4A), which is consistent with the  
287 previous studies [38]. Immuno-gold labeling with CD63 primary antibody  
288 followed by TEM confirmed the presence of this classical exosomal marker on  
289 the surface (Fig. 4B) [39]. Immuno-blot analysis for exosome-specific markers  
290 such as Rab5b, Alix, and CD63 established their enrichment on the exosomal  
291 fraction relative to cell lysate (Fig. 4C). LAMP2 was present in both the  
292 fractions as previously shown (Fig. 4C) [39]. Finally, we demonstrated that the  
293 pretreatment of *Mtb* infected RAW264.7 macrophages with GW4869  
294 significantly reduced the release of exosome as revealed by the loss of CD63  
295 marker as compared to untreated or *Mtb* infected RAW264.7 macrophages  
296 (Fig. 4D). Altogether, we confirmed the isolation of exosomes from *Mtb*  
297 infected macrophages for investigating redox-dependent activation of HIV-1.

298

299 Various concentrations of exosomes isolated from *Mtb* infected  
300 RAW264.7 macrophages were used to treat U1 and HIV-1 reactivation was

301 measured by p24 immuno-staining and qRT-PCR of *gag* transcript. As  
302 compared to uninfected control, *Mtb* specific exosomes significantly induce  
303 HIV-1 reactivation from U1. Both p24 staining and *gag* qRT-PCR displayed ~  
304 4-fold increase as compared to uninfected control (Fig. 4E, 4F, and 4G).  
305 Exosomes isolated from macrophages infected with *Hk-Mtb* were ineffective  
306 in reactivating HIV-1 (Fig. 4E, 4F, and 4G). However, the exosomes derived  
307 from RAW264.7 macrophages infected with MDR and XDR strains of *Mtb*  
308 were equally potent in reactivating HIV-1 (Fig. 4H and 4I). Finally, to  
309 conclusively show that exosomes derived from *Mtb* infection reactivate HIV-1,  
310 we treated U1 with exosomes isolated from serum and lungs of mice  
311 chronically infected with *Mtb* and stained for p24. In both cases, we observed  
312 a significant reactivation (~ 5-fold) of HIV-1 as compared to exosomes  
313 isolated from uninfected animals. (Fig. 4J and 4K) However, exosomes  
314 isolated from *Mtb* infected lungs reactivated HIV-1 at a lower concentration  
315 than serum (Fig. 4J and 4K). Taken together, our data suggest that exosomes  
316 could be one of the important mediators of HIV-1 reactivation during *Mtb*  
317 infection.

318

### 319 **Exosomes from *Mtb* infected macrophages modulate redox potential** 320 **and host gene expression of U1 cells**

321 Elevated ROS, RNI, and depletion/oxidation of intracellular thiols  
322 (cysteine, thioredoxin, GSH) were shown to activate the HIV-1 long terminal  
323 repeat (LTR) through the redox-responsive transcription factor NFκB [40, 41].  
324 Therefore, we first tested if exosomes derived from RAW 264.7 infected with  
325 various *Mtb* strains induce oxidative stress to reactivate HIV-1. Treatment of

326 U1/Grx1-roGFP2 with exosomes derived from RAW 264.7 infected with *Mtb*  
327 H37Rv, MDR, and XDR strains uniformly increases biosensor ratio at 24 h  
328 and 48 h post-treatment, indicating oxidative stress (Fig. 5A). As expected,  
329 exosomes derived from uninfected or *Hk-Mtb* infected RAW 264.7 failed to  
330 induce oxidative stress in U1 cells (Fig. 5A). To show that exosomes-triggered  
331 oxidative shift in  $E_{GSH}$  precedes HIV-1 reactivation, we pretreated U1 cells  
332 with the GSH-specific antioxidant, N-acetyl cysteine (NAC), followed by  
333 exosomes addition. Treatment with NAC entirely abrogated the potential of  
334 *Mtb* specific exosomes to reactivate HIV-1 in a concentration dependent  
335 manner (Fig. 5B). This result reiterates that oxidative stress is likely to be an  
336 important mechanism induced by *Mtb*-specific exosomes to reactivate HIV-1.

337

338 To further understand the mechanism of exosomes mediated HIV-1  
339 reactivation, we examined the influence of *Mtb* specific exosomes on host  
340 gene expression using NanoString nCounter gene expression analysis. This  
341 technology permits for the absolute quantification of a large number of RNA  
342 transcripts without any requirements for reverse transcription or DNA  
343 amplification [42]. From the NanoString panel, we focused on host genes that  
344 respond to HIV replication (e.g., HIV receptors-ligands, proteins involved in  
345 HIV replication, inflammatory response, apoptosis, cell cycle, and transcription  
346 activators of HIV LTR) as well as genes involved in oxidative stress response  
347 (Table S1a-S1c). Exosomes derived from uninfected or *Mtb* (live or *Hk*)  
348 infected RAW 264.7 macrophages were used to treat U1 and total RNA was  
349 isolated at 12 h post-treatment. An early time point is taken to ensure that we  
350 capture gene expression changes that precede HIV-1 reactivation upon

351 exosomes challenge. Also, at a later time point, the primary effect of  
352 exosomes can be masked due to transcriptional changes in response to HIV  
353 proliferation and associated cytopathic consequences. PMA treated U1 were  
354 taken as a positive control. Consistent with our biosensor data, treatment with  
355 viable *Mtb*-specific exosomes induces genes encoding components of  
356 superoxide-producing enzyme- NADPH oxidase (e.g., cytochrome B-245 Beta  
357 chain [CYBB], NCF1, and NCF2) (Fig. 5C). As a consequence, several genes  
358 involved in mitigating ROS and maintaining redox balance such as PRDX2  
359 (peroxiredoxin) [43], TXNRD1 (thioredoxin reductase 1) [44], sodium-  
360 dependent cysteine-glutamate antiporter (SLC7A11) [45], and ferritin (FTH1)  
361 [46] were highly induced in U1 treated with *Mtb*-exosomes than *Hk-Mtb* or  
362 uninfected exosomes (Fig. 5C). Additionally, a gene encoding heme  
363 oxygenase 1 (HMOX1) is highly induced in U1 treated with *Mtb*-exosomes  
364 (Fig. 5C). HMOX1 is involved in heme catabolism and its dysregulation and  
365 polymorphism in its promoter are linked with HIV- associated neurocognitive  
366 disorder [47]. Gene encoding a member of the selenoprotein family (VCP-  
367 interacting membrane protein [VIMP], also known as selenoprotein S was  
368 induced by *Mtb*-exosomes (Fig. 5C). VIMP is a redox-sensing protein that  
369 regulates inflammation by mediating cytokine production [48], suggesting that  
370 VIMP can coordinate HIV-1 reactivation by triggering an inflammatory reaction  
371 in response to oxidative stress induced by *Mtb*-exosomes.

372

373 In agreement with HIV-1 reactivating potential of *Mtb*-exosomes, genes  
374 involved in ensuring HIV-1 LTR activation were induced. For example,  
375 NFkBIA and SQSTM1/P62 involved in the activation of transcription factor

376 NF $\kappa$ B were upregulated [49](Fig. 5C). Another transcription factor FOS, which  
377 reactivates HIV-1 [50], was also upregulated by *Mtb*-exosomes. Several  
378 genes encoding host inflammatory mediators were induced by *Mtb*-  
379 exosomes. For examples, expression of CXC chemokine subfamily (CXCL8),  
380 monocyte chemoattractant protein 1 (MCP1; CCL2) and macrophage-  
381 inflammatory-protein-1 alpha (MIP-1a; CCL3) showed greater expression in  
382 U1 treated with *Mtb* specific exosomes as compared to *Hk-Mtb* or uninfected  
383 exosomes (Fig. 5C). All of these factors are well known to facilitate HIV-1  
384 infection and promote replication in macrophages [51]. In facts, higher levels  
385 of CCL2 were detected in the bronchoalveolar lavage (BAL) fluid of pulmonary  
386 TB patients and pleural fluid of HIV-1 infected patients, indicating the  
387 importance of this proinflammatory cytokine in HIV-TB co-infection [52].  
388 Interestingly, apolipoprotein B mRNA-editing enzyme catalytic polypeptide-like  
389 3G (APOBEC3G), a known HIV restriction factor [53], was also induced by *Mtb*-  
390 exosomes. In addition to viral restriction, APOBEC3G activity also promotes  
391 heterogeneity in HIV sequence resulting in HIV phenotypes with greater capacity  
392 to escape immune pressures [54]. Therefore, it's likely that co-infection with *Mtb*  
393 and subsequent exosomes release can accelerate APOBEC3G mediated  
394 generation of more fit viral variants. Consistent with this, pleural fluid  
395 mononuclear cells (PFMCs) from HIV/TB coinfecting patients show higher  
396 expression of APOBEC3G [55]. Lastly, gene encoding serpin peptidase  
397 inhibitor, clade C (SERPINC1; antithrombin) that induces at very early stages  
398 of HIV-1 replication, and is a component of the viral core [56], was  
399 upregulated by *Mtb* exosomes (Fig. 5C). We found a striking similarity  
400 between the transcriptional signatures of host genes induced by *Mtb*-  
401 exosomes to those induced by the PMA treatment (Fig. 5D), confirming that



402 *Mtb*-exosomes are eliciting host response associated with HIV-1 reactivation.

403 Taken together, exosomes released by *Mtb* infected macrophages modulate

404 host redox metabolism and inflammatory response to ensure HIV-1

405 reactivation.

406

407 **Influence of *Mtb*-specific exosomes on oxidative phosphorylation**

408 **(OXPHOS) of U1 cells**

409

410 We have previously shown that HIV-1 reactivation precedes an oxidative

411 shift in mitochondrial  $E_{GSH}$  and the mitochondrial redox physiology closely

412 coincides with the progression of HIV disease [20]. This indicates that *Mtb*-

413 exosomes might influence the mitochondrial physiology of HIV infected cells

414 to promote oxidative stress and viral replication. To examine this possibility,

415 we performed a real-time assessment of the mitochondrial function of U1 cells

416 in response to *Mtb*-specific exosomes. We quantified mitochondrial

417 physiology by measuring several key parameters associated with oxidative

418 phosphorylation (OXPHOS) using Seahorse XF Flux technology (Fig. 6A).

419

420 Several parameters of mitochondrial respiration, including basal

421 respiration (Basal-Resp), ATP-linked respiration, proton leak and spare

422 respiratory capacity (SRC), were derived by the successive addition of

423 pharmacological agents to the exosomes challenged U1 cells, as outlined in

424 Figure 6A. To determine each parameter, three reiterated rates of oxygen

425 consumption (OCR) are made over an 80-minute period. Firstly, baseline

426 cellular oxygen consumption (OCR) is measured, from which Basal-Resp is

427 derived by subtracting non-mitochondrial respiration. Secondly, an inhibitor of  
428 complex V (oligomycin) is added, and the resulting OCR is used to calculate  
429 ATP-linked OCR (by deducting the OCR after oligomycin addition from  
430 baseline cellular OCR) and proton leak (by subtracting non-mitochondrial  
431 respiration from the OCR upon oligomycin addition). Thirdly, maximal  
432 respiration (Max Resp), which is the change in OCR after uncoupling ATP  
433 synthesis from electron transport by adding carbonyl cyanide-4-  
434 (trifluoromethoxy)phenylhydrazone (FCCP). Lastly, antimycin A, a complex III  
435 inhibitor, and rotenone, a complex I inhibitor, are added together to inhibit  
436 ETC function, revealing the non-mitochondrial respiration (Non-Mito Resp).  
437 The spare respiratory capacity (SRC) is calculated by subtracting basal  
438 respiration from maximal respiratory capacity.

439

440 U1 cells were treated with exosomes isolated from RAW264.7 infected  
441 with viable or *Hk-Mtb* for 48 h. Following this, U1 cells were seeded on to the  
442 XF cartridge plates and subjected to the mitochondrial stress test to measure  
443 various OXPHOS parameters as described earlier. As compared to exosomes  
444 from uninfected macrophages, treatment of U1 cells with *Mtb*-specific  
445 exosomes significantly decreased various respiratory parameters including  
446 basal respiration, ATP-linked OCR, and H<sup>+</sup> leak (Fig. 6B and 6D). In contrast,  
447 the non-Mitochondrial Resp was significantly increased, whereas SRC was  
448 not significantly affected (Fig. 6B and 6D). Exosomes derived from  
449 macrophages infected with *Hk-Mtb* modulate OXPHOS parameters  
450 comparable to exosomes from uninfected macrophages (Fig. 6C and 6E). The  
451 contrasting influence of viable and *Hk-Mtb* exosomes on Basal-Resp, ATP-

452 linked OCR and proton leak indicate a profound deceleration of respiration of  
453 U1 upon reactivation of HIV-1 by *Mtb* exosomes. Generation of ROS (e.g.,  
454 superoxide) is an inevitable consequence of normal mitochondrial respiration.  
455 Since *Mtb* exosomes induce an oxidative shift in  $E_{GSH}$  of U1, a decrease in  
456 Basal-Resp and ATP-linked OCR could be a cellular strategy to avoid  
457 overwhelming oxidative stress. This would ensure successful HIV-1  
458 reactivation without triggering the detrimental effects of ROS on U1. Agreeing  
459 to our findings, active HIV-1 replication depends largely on increased  
460 glycolytic flux rather than OXPHOS to meet the surge in biosynthetic and  
461 bioenergetics demand [57].

462

463 Our OXPHOS results also provide clues about the mechanism of an  
464 oxidative shift in  $E_{GSH}$  upon HIV reactivation by exosomes. We observed a  
465 significant increase in non-mitochondrial  $O_2$  consumption in the case of U1  
466 treated with *Mtb* specific exosomes (Fig. 6D and 6E). Non-mitochondrial  $O_2$   
467 consumption is usually due to activities of enzymes associated with  
468 inflammation such as lipoxygenase, cyclo-oxygenase, and NADPH oxidase  
469 [58]. Consistent with this, our NanoString data showed an increased  
470 expression of genes encoding various components of the NADPH oxidase  
471 complex. Altogether, HIV-1 reactivation by *Mtb*-specific exosomes was  
472 associated with a marked change in OXPHOS parameters including a  
473 reduced basal OCR and ATP-linked OCR. An increased Non-Mito OCR is  
474 likely responsible for the generation of oxidative stress during HIV-TB co-  
475 infection.

476

## 477 **Proteomics of exosomes released upon *Mtb* infection**

478 Having established that *Mtb* specific exosomes reactivate HIV-1 by  
479 modulating redox and bioenergetics, we sought to determine the content of  
480 exosomes. Mycobacterial components (e.g., lipids, proteins, and RNA) that  
481 exert pro-inflammatory responses are consistently enriched in the exosomes  
482 of *Mtb* infected macrophages [59, 60]. However, the identity of host proteins  
483 within exosomes isolated from *Mtb* infected macrophages remains  
484 uncharacterized. This is important as immune-activated macrophages secrete  
485 several redox-signaling proteins involved in eliciting proinflammatory response  
486 and oxidative stress in the neighboring cells [43]. On this basis, we reasoned  
487 that profiling of exosome-associated host-proteins likely shed new insight on  
488 how *Mtb* induces HIV-reactivation.

489

490 We identified proteins associated with exosomes from uninfected, live  
491 *Mtb*, and *Hk Mtb* infected RAW264.7 cells using LC-MS/MS (Fig. 7A). In total,  
492 4953 proteins were identified in all three samples with two-biological  
493 replicates (Sequest Program, Fig. 7A, Table S2). As expected, a high  
494 correlation value ( $> 0.90$ , Pearson correlation coefficient) was observed within  
495 the two biological replicates from the same group than unrelated groups (0.6-  
496 0.7) (Fig. S3C). About 80 of the 100 most identified exosomal proteins of the  
497 ExoCarta database were identified in our dataset. While ~3250 proteins  
498 overlapped among the three groups, we discovered that 86, 298, and 142  
499 proteins were exclusively present in the uninfected, live *Mtb*, and *Hk Mtb*,  
500 respectively (Fig. S3B). The highest numbers of proteins in case of live *Mtb*  
501 exosomes clearly indicates that *Mtb* infection promotes secretion of proteins

502 in exosomes. Analysis of differentially expressed proteins (Table S3a-S3c)  
503 (log 2 fold,  $P \leq 0.01$ ) showed that in comparison to uninfected samples, 436  
504 proteins were up-regulated and 290 were down-regulated in live *Mtb*-  
505 exosomes (Fig. 7B). Similarly, 390 proteins were induced and 337 were  
506 repressed in *Hk-Mtb* as compared to uninfected samples (Fig. 7B). Direct  
507 comparison of live versus *Hk-Mtb* revealed that ~ 40 proteins were  
508 differentially enriched in exosomes derived from live *Mtb* infected  
509 macrophages (Fig. 7B). This suggests that live *Mtb*-derived exosomes contain  
510 different proteins, which might mediate more specific function such as redox  
511 imbalance and HIV reactivation upon secretion.

512

513 Biological process analysis of Gene ontology (GO) showed that the  
514 differentially expressed proteins belong to diverse categories including  
515 cellular/metabolic processes, biological regulation and response to stimulus  
516 (Fig. S4). Molecular function analysis of GO revealed that most of the proteins  
517 carry out binding and catalytic activity, indicating their roles in exosomes  
518 cargo sorting, release, and uptake by the recipient cells (Fig. S5). This is  
519 further confirmed by cell component analysis wherein exosomal proteins  
520 mainly belonged to cell organelle, membrane, and macromolecular complexes  
521 involved in exosome biogenesis (Fig. S5) (Table S4a-S4c, S5a-S5c, S6a-  
522 S6c).

523

524 Next, we classified the differentially expressed proteins of each group by  
525 KEGG signaling pathway (Table S7) of KEGG database (Fig. 7C). *Mtb*  
526 exosomes were found to be enriched with proteins involved in glycolysis,

527 gluconeogenesis, fructose and mannose metabolism, galactose metabolism,  
528 pentose phosphate pathway (PPP), cysteine and methionine metabolism.  
529 Increased oxidative stress in HIV infected patients is associated with higher  
530 glucose utilization and deficiency of cysteine and methionine [61-63].  
531 Enrichment of sugar metabolic enzymes in *Mtb* exosomes possibly assists in  
532 HIV-1 reactivation by fueling ATP generating processes for the energy  
533 consuming functions such as virus transcription, translation, packaging, and  
534 release. Similarly, cysteine metabolism serves as a source of GSH  
535 biogenesis, while PPP enzymes provides NADPH for regenerating GSH from  
536 GSSG. Both of these activities are essential for alleviating excessive oxidative  
537 stress to avoid cell death during HIV-1 reactivation [16]. We observed  
538 enrichment of proteins coordinating RNA transport/quality control, DNA  
539 replication, and cell cycle, all of which are important for the reactivation of  
540 HIV-1 [64, 65]. Importantly, estrogen signaling proteins involved in induction of  
541 mitochondrial ROS and HIV-1 reactivation are enriched in *Mtb*-exosomes [66,  
542 67]. HIF-1 signaling plays an important role in HIV-1 pathogenesis by  
543 facilitating viral replication and promoting lymphocyte and macrophage  
544 mediated inflammatory response [68]. HIF-1 pathway proteins are specifically  
545 induced in *Mtb* exosomes (Fig. 7C).

546

547 We discovered that several members of heat shock protein family (HSP)  
548 and galectins were exclusively enriched in *Mtb* exosomes. *Mtb* infected  
549 macrophages are reported to secrete HSPs in exosomes to induce  
550 proinflammatory response (NF $\kappa$ B and TNF $\alpha$ ) from the uninfected bystander  
551 cells [69]. Furthermore, HSP such as Hsp90 potently reactivates HIV from

552 latently infected cell lines and CD4+ T cells [70]. Likewise, galectins are  
553 consistently associated with oxidative stress, inflammation, and HIV-1  
554 reactivation [71, 72]. Finally, STAT-1 of JAK-STAT signaling pathway, which  
555 is well known to modulate HIV replication cycles, was enriched in *Mtb*-specific  
556 exosomes [73, 74].

557

558 Altogether, infection with viable *Mtb* induces secretion of specific  
559 proteins in exosomes to reactivate HIV-1 by affecting redox, central  
560 metabolism, and inflammatory responses.

561

#### 562 **HSPs and Galectins facilitate HIV-1 reactivation by *Mtb* exosomes.**

563 Since multiple pathways are likely to synergies during HIV-1  
564 reactivation by *Mtb* specific exosomes, determination of the specific  
565 proteins/pathways in this process is challenging. However, to begin  
566 delineating the role of some of the components secreted in exosomes upon  
567 *Mtb* infection in HIV-1 reactivation, we decided to examine the effect of HSPs  
568 and galectins. We first examined the effect of Hsp90 pathway by using a  
569 specific inhibitor of Hsp90- 17-(N-allylamino)-17-demethoxygeldanamycin (17-  
570 AAG) [70]. The inhibitor 17-AAG binds to ATPase pocket of HSP90 and  
571 compete with ATP, resulting in inactivation of chaperone function [70]. U1  
572 cells were stimulated with PMA and HIV-1 reactivation was monitored in the  
573 presence or absence of 17-AAG by scoring for p24 positive cells using flow  
574 cytometry. The 17-AAG completely abolished PMA-mediated HIV-1  
575 reactivation but showed no effect on the basal expression of p24 in the

576 unstimulated cells (Fig. 8A). Similarly, 17-AAG significantly decreased HIV-1  
577 reactivation in U1 by *Mtb*-specific exosomes (Fig. 8B).

578

579 To understand how galectins modulate exosomes mediated reactivation  
580 of HIV-1, we exploited the lactose binding property of galectins. Galectins  
581 form a complex with lactose, via carbohydrate binding domain, which inhibits  
582 galectins activities [75]. Galectins control numerous biological functions  
583 mainly by binding to the cell surface associated glycoproteins or glycolipid  
584 receptors. Therefore, we thought of inhibiting the activity of galectins before  
585 it's transported in the *Mtb*-specific exosomes to preclude its interaction with  
586 the U1 cell surface glycoproteins/receptors. To do this, we treated *Mtb*  
587 infected RAW 264.7 macrophages with 50 and 100 mM of lactose for 24 h  
588 and exosomes were isolated. These exosomes were then used to reactivate  
589 HIV-1 in U1. As shown in figure 8C, exosomes isolated from the lactose  
590 treated cells significantly reduced the ability of *Mtb*-specific exosomes to  
591 reactivate HIV-1 from U1 monocytes. Altogether, *Mtb*-specific exosomes  
592 harbor and convey cellular effectors responsible for reversing viral latency in  
593 cell lines chronically infected with HIV-1.

594

595

## 596 **Discussion**

597 We have previously shown that a marginal oxidative shift in  $E_{GSH}$  is  
598 sufficient to reactivate HIV-1 [20]. Others have shown that *Mtb* induces  
599 oxidative stress and GSH imbalance in the infected macrophages, animals,  
600 and humans [21, 22]. HIV-TB co-infected patients suffer from glutathione



601 stress, metabolic deficiencies, and immune-dysfunction [21]. Critically, we  
602 now made an effort to unify in a coherent picture of these separate  
603 observations, establishing a functional link between *Mtb* induced oxidative  
604 stress and HIV-1 reactivation from latency, which may have therapeutic  
605 implications. Furthermore, we provide evidence for oxidative stress-mediated  
606 HIV-1 reactivation, which relies on the secretion of biological effectors present  
607 in the exosomes released from *Mtb* infected macrophages. Although with  
608 hindsight the connection between *Mtb*, oxidative stress and HIV-1 reactivation  
609 might appear obvious, intracellular redox metabolism is dependent on many  
610 pathways, and HIV-1 reactivation is a multifactorial process, hence we expect  
611 multiple mechanisms where redox might be interlinked. In fact, our  
612 NanoString data suggest that the effect of *Mtb*-specific exosomes on HIV  
613 reactivation is likely mediated by diverse genetic factors. For example, gene  
614 expression data indicate that superoxide generation by NADPH oxidase could  
615 be one of the factors contributing to an oxidative shift in  $E_{GSH}$  and HIV-1  
616 reactivation upon treatment with exosomes. However, the induction of several  
617 genes encoding antioxidant enzymes contradicts the requirement of ROS for  
618 viral reactivation. It appears that cells attempt to mitigate excess ROS to  
619 ensure exosome-mediated HIV-1 reactivation without triggering global ROS-  
620 mediated cytotoxicity. Consistent with this, treatment with *Mtb*-specific  
621 exosomes induces only a modest oxidative shift in  $E_{GSH}$  (-276 mV) of U1.  
622 Similar oxidative changes in  $E_{GSH}$  were earlier found to uniformly reactivate  
623 HIV-1 from latency without affecting viability [20]. Low levels of ROS are  
624 known to activate HIV LTR via activation of NFκB. Agreeing to this,  
625 expression data confirm the induction of NFκBIA and SQSTM1/P62 involved

626 in NFKB activation upon exosome treatment. The induction of AP-1 (FOS),  
627 which is activated by ROS and reactivates HIV-1 [50], also indicate that  
628 exosomes-promoted oxidative stress acts as a critical cue to reactivate HIV-1  
629 via redox-sensitive transcription factors. This explanation aligns well with the  
630 ability of the antioxidant, NAC, in subverting HIV-1 reactivation by exosomes.

631

632 Recently, several studies have examined the contribution of metabolic  
633 indicators (OXPHOS and glycolysis) in determining susceptibility to HIV-1  
634 infection and replication [57, 62]. Overall, these studies revealed the  
635 requirements of high OXPHOS and glycolysis rates for HIV-1 infection and  
636 continued replication [57]. In contrast, quantification of respiratory and redox  
637 parameters during HIV-1 reactivation is lacking. In this context, our data  
638 indicate a critical role of oxidative stress in reactivating HIV-1 by *Mtb*  
639 exosomes. Consistent with this, a recent study demonstrated that exosomes  
640 from *Mtb* infected neutrophils trigger superoxide production in macrophages  
641 [76]. However, the mechanism of superoxide generation remains  
642 uncharacterized. Since the respiratory chain is the major site for generation of  
643 ROS such as superoxide, cell flux assays showing *Mtb* exosome-mediated  
644 deceleration of mitochondrial OCR provide new mechanistic insight. It is well  
645 known that reduced mitochondrial OCR leads to build up of NADH, which  
646 results in trapping of flavin mononucleotide (FMN) in the reduced state on  
647 complex I of the electron transport chain [77]. Reduced FMN has been  
648 consistently shown to donate one electron to O<sub>2</sub> resulting in the generation of  
649 superoxide by complex I [77]. Other sites in mitochondria, which communicate  
650 with NADH and coenzyme Q (COQ) pools such as complex III and α-

651 ketoglutarate dehydrogenase, also produce superoxide and H<sub>2</sub>O<sub>2</sub> during slow-  
652 down of OCR [77].

653

654 We discovered that contrary to mitochondrial OCR, non-mitochondrial  
655 OCR is significantly induced by *Mtb*-specific exosomes, which links oxidative  
656 stress with the enzymatic activities unrelated to mitochondria (e.g., NADPH  
657 oxidase, lipoxygenase, and cyclo-oxygenase) as ROS sources [58]. All of  
658 these enzymes are influenced by HIV infection and are well known to  
659 generate ROS and influence GSH homeostasis [78-80]. Importantly, a recent  
660 study showed that the treatment of bone marrow-derived macrophages  
661 (BMDM) with exosomes derived from *Mtb* infected macrophages increases  
662 recruitment of NADH oxidase on the phagosomes [60]. Taken together, data  
663 suggest that both mitochondrial and non-mitochondrial mechanisms  
664 associated with oxygen consumption likely mediate ROS generation and HIV-  
665 1 reactivation by *Mtb* exosomes.

666

667 Exosomes isolated from *Mtb* infected macrophages contain bacterial  
668 lipids, proteins, and RNA, which stimulate a pro-inflammatory response in  
669 bystander macrophages. Our study updated this knowledge by including the  
670 potential of *Mtb* exosomes in modulating redox and bioenergetics of  
671 uninfected bystander cells, which affects HIV-1 latency and reactivation  
672 program. Rather than mycobacterial components, which are well  
673 characterized, we focused on identifying the macrophage proteins enriched in  
674 *Mtb* exosomes to understand the contribution of the host on virus reactivation.  
675 Various proteins associated with host pathways mediating HIV-1 reactivation

676 were enriched in *Mtb* exosomes. Secretion of HSP90 along with its co-  
677 chaperone Cdc37 and galectins were found to be important for *Mtb* exosomes  
678 mediated virus reactivation. HSP90 is abundantly present in the serum of HIV-  
679 TB co-infected patients [81]. Galectins such as Gal3 secretes in exosomes  
680 [82] and promotes redox imbalance [83], whereas Gal9 is frequently found in  
681 the plasma of TB patients [84] and reactivates HIV-1 [71]. While we have  
682 characterized the proteome of *Mtb*-exosomes derived from macrophages, it is  
683 certain that the presence of immuno-modulatory proteins, lipids, and RNA of  
684 *Mtb* will also influence HIV-1 reactivation.

685

686 Our findings have therapeutic implications. For example, HSP90  
687 inhibitor, SNX-5422, shows a good safety profile in patients with solid tumors  
688 [85]. One can envisage using these inhibitors along with HAART to repress  
689 HIV-1 reactivation and replication in HIV-TB co-infected patients, at least in  
690 early stages of post-infection, when the viral reservoir is small. Furthermore,  
691 reactivation of latent virus coupled with HAART has been put forward as a  
692 possible “Kick-and-Kill” approach to eliminate latent reservoir. However, most  
693 of the screening efforts identified latency-reversing agents that are cytotoxic.  
694 Since the *Mtb*-specific exosomes mediate HIV-1 reactivation without causing  
695 overwhelming oxidative stress, we anticipate that co-treatment of *Mtb*  
696 exosomes with HAART can target HIV-1 reservoir without triggering global  
697 cytotoxicity. Exosomes derived from *Mtb* infected macrophages were already  
698 reported to potentiate the antimycobacterial activity of anti-TB drugs *in vivo*  
699 [60], suggesting that a combination of *Mtb* exosomes with HAART and/or anti-  
700 TB drugs can be exploited to reduce the burden of HIV-TB co-infection.

701

702 In conclusion, we identified new paradigms in HIV-TB co-infection,  
703 including the role of *Mtb* exosomes in inducing oxidative stress and  
704 decelerating OXHPOS in the cells latently infected with HIV-1. These events  
705 act as a signal to trigger a transcriptional response that promotes HIV-1  
706 reactivation and inflammation. Identification of host factors enriched in *Mtb*  
707 exosomes to mediate virus reactivation has direct implications on the  
708 mechanism of HIV-1 reactivation and multiplication in HIV-TB co-infected  
709 individuals. Thus, the quantifiable redox and respiratory parameters along  
710 with the transcript and protein signatures established in this study would  
711 enable direct assessment of future antimicrobials against HIV and TB  
712 coinfection.

713

714

## 715 **Materials and methods**

### 716 **Cell lines, Bacterial cultures**

717 The human monocytic cell line U937, murine macrophage cell line  
718 RAW264.7, chronically HIV-1 infected U1 (monocytic cell line) and J1.1 (T-  
719 lymphocytic cell line) were cultured as described earlier [20, 86]. J-Lat 10.6  
720 cells (Jurkat T-lymphocytic cell line, is a reporter cell line, containing a full-  
721 length integrated HIV-1 genome with a non-functional *env* due to frame shift  
722 and *gfp* in place of *nef* gene) were maintained in RPMI-1640 (Cell Clone)  
723 supplemented with 10% heat inactivated Fetal Bovine Serum (Sigma Aldrich),  
724 2 mM L-glutamine, 100 U/ml penicillin and 100 mg/ml streptomycin (Sigma  
725 Aldrich) at 37°C and 5% CO<sub>2</sub>. Bacterial strains used in this study are wild  
726 type *Mycobacterium tuberculosis* H37Rv (*Mtb*), *Mycobacterium bovis* Bacillus

727 Calmette Guerin (BCG), single drug resistant (SDR) clinical isolate BND 320,  
728 multiple drug resistant (MDR) clinical isolates Jal 1934, Jal 2261, and  
729 extensively drug resistant (XDR) clinical isolate MYC 431 (kind gift from Dr.  
730 Kanury V.S. Rao, ICGEB, New Delhi), were grown till mid log phase ( $OD_{600}$  of  
731 0.8) as described previously [86]. For tdTomato expressing *Mtb* strains,  
732 competent cells were prepared as described in [86] and were electroporated  
733 using 1  $\mu$ g of the pTEC27 plasmid (pMSP12::tdTomato, kind gift from Prof.  
734 Deepak Saini, IISc, Bangalore) with settings of 2.5 kV voltage, 25  $\mu$ F  
735 capacitance and 1000  $\Omega$  resistance in Bio Rad Gene Pulser. Electroporated  
736 bacilli were kept for overnight recovery in 7H9 followed by selection on 7H11  
737 agar plates containing hygromycin (50  $\mu$ g/ml). After 21 days of selection,  
738 bacteria were grown in 7H9 broth till mid-log phase and used for further  
739 studies. For generating heat killed *Mtb* (*Hk-Mtb*), bacilli were killed by  
740 resuspending the pellet in 2 ml of RPMI and heating it to 80 °C for 30 minutes  
741 (min) using established protocol [87].

742

#### 743 ***Mtb* labelling with PKH-26 GL, complement opsonization and infection**

744 Freshly grown *Mtb* bacilli were labelled with fluorescent lipophilic dye  
745 PKH-26 GL (Sigma-Aldrich) as per the manufacturer's instructions to prepare  
746 red labelled bacteria to distinguish between *Mtb* infected and bystander cells.  
747 Briefly, pelleted *Mtb* bacilli were resuspended in 300  $\mu$ l of diluent C.  
748 Fluorescent staining was performed at a final concentration of 10  $\mu$ M for 15  
749 min at room temperature and fetal bovine serum (FBS) was added to  
750 terminate the labelling process. Bacilli were then washed thoroughly three  
751 times with 1X phosphate buffer saline (PBS) and resuspended in RPMI-1640

752 (Cell Clone). For complement opsonization *Mtb* bacilli were opsonized in 50%  
753 human serum for 30 min at 37 °C as described [88] and then washed three  
754 times in 1X PBS. For infection, U937 cells stably expressing Grx1-roGFP2 in  
755 the cytosol were seeded at a density of 0.2 million per well in 24-well plates  
756 and were differentiated into macrophages by a 24 h treatment with 5 ng/ml of  
757 phorbol 12-myristate 13-acetate (PMA; Sigma-Aldrich Co. Saint Louis, MO,  
758 USA). Cells were rested overnight following chemical differentiation to ensure  
759 that they reverted to a resting phenotype before infection. Differentiated U937  
760 cells were then infected with *Mtb* at multiplicity of infection (moi) 10 and  
761 incubated for 4 h at 37 °C in 5% CO<sub>2</sub>. Cells were then treated with amikacin at  
762 200 µg/ml for 2 h to kill extracellular bacteria. After infection cells were  
763 washed thoroughly with 1X PBS and resuspended in complete media (RPMI  
764 supplemented with 10% FCS).

765

#### 766 **Redox potential measurements**

767 The intracellular redox potential measurements were performed as  
768 described previously [20]. Briefly, U937 cells stably expressing Grx1-roGFP2  
769 in the cytosol were infected with PKH-26 labelled *Mtb*. At the indicated time  
770 points, cells were treated with 10mM N-ethylmaleimide (NEM) for 5 min and  
771 fixed with 4% paraformaldehyde (PFA) for 15 min at room temperature. After  
772 washing with 1X PBS cells were analysed using FACS Verse flow cytometer  
773 (BD Biosciences). The biosensor response was measured by analysing the  
774 ratio upon excitation at 405 and 488 nm and emission at 510nm. Data was  
775 analysed using FACSuite software. For each experiment the minimal and  
776 maximal fluorescence ratios were determined, which correspond to 100%

777 sensor reduction and 100% sensor oxidation, respectively. Cumene  
778 hydroperoxide (CHP, 0.5 mM) was used as the oxidant and dithiothreitol  
779 (DTT, 40 mM) as the reductant.  $E_{GSH}$  was measured using the Nernst  
780 equation as described previously [20].

781

## 782 **Co-cultures of U937 macrophages with J-Lat and U1 cells**

783 Co-cultures were performed according to earlier established protocol  
784 [89]. U937 cells were seeded at a density of 0.2 million/ml in 24 well plates  
785 and were infected with *Mtb* as described earlier. J-Lat and U1 cells were  
786 added at a density of 0.1 million/ml on uninfected or infected U937  
787 monolayers after amikacin treatment. Co-cultures were performed in complete  
788 medium (RPMI 1640 plus 10% FCS, 2 mM L-glutamine) at 37 °C and 5% CO<sub>2</sub>  
789 for 5 days (d) in case of J-Lat cells and 48 h in case of U1 cells. Fresh media  
790 was added in J-Lat cells after 48 h. At indicated time points, the supernatants  
791 containing J-Lat and U1 cells were collected and centrifuged at 1500 rpm, 5  
792 min to harvest cells. J-Lat and U1 cells were fixed in 4% PFA for 15 minutes,  
793 centrifuged at 1500 rpm, 5 min and resuspended in 1X PBS for FACS  
794 analysis. PMA and TNF- $\alpha$  were used at a final concentration of 5 ng/ml and  
795 10 ng/ml, respectively.

796

## 797 **Culturing of J-Lat and U1 cells in U937-conditioned media**

798 J-Lat and U1 cells were seeded at a density of 0.1 million/ml in 24 well  
799 plates in the absence or presence of two-fold dilutions of the supernatants  
800 derived from *Mtb* uninfected or infected U937 macrophages. J-Lat and U1  
801 cells were also cultured in two-fold dilution of the culture supernatant collected



802 from *Mtb* infected U937 macrophages grown in presence of 10  $\mu$ M of  
803 exosome secretion inhibitor (GW4869). Presence of intact *Mtb* cells in the  
804 supernatant was ruled out by passing of supernatant through 0.2  $\mu$ m filter  
805 followed by confirmation of bacterial viability by plating of the supernatant. J-  
806 Lat and U1 cells were harvested at different time points and were fixed in 4%  
807 PFA for 15 minutes. After centrifugation cells were resuspended in 1X PBS for  
808 FACS analysis.

809

### 810 **HIV-1 p24 staining**

811 For intracellular p24 staining, U1 cells were washed with FACS buffer  
812 (1X PBS containing 10% human serum) followed by fixation and  
813 permeabilization using the fixation/permeabilization kit (eBiosciences).  
814 Permeabilized cells were then incubated with 100  $\mu$ l of 1:100 dilution of  
815 phycoerythrin-conjugated mouse anti-p24 mAb (KC57-RD1; Beckman  
816 Coulter, Inc.) for 30 min at 4  $^{\circ}$ C with intermittent mixing. After washing  
817 samples twice with FACS buffer, cells were analysed with BD FACS Verse  
818 Flow cytometer (BD Biosciences). Data was analysed using FACSuite  
819 software.

820

### 821 **qRT-PCR**

822 Total RNA was isolated using RNeasy mini kit (Qiagen), according to  
823 the manufacturer's instructions. RNA (500 ng) was reverse transcribed to  
824 cDNA using iScript<sup>TM</sup> cDNA synthesis kit (Bio-Rad) using random  
825 oligonucleotide primers. p24 specific primers (p24, Forward- 5'  
826 ATAATCCACCTATCCCAGTAGGAGAAAT 3' and Reverse- 5'

827 TTGGTTCCTTGTCTTATGTCCAGAATGC 3') were used to perform PCR.  
828 Gene expression was analysed with real time PCR using iQTM SYBR Green  
829 Supermix (Bio-Rad) and a CFX96 RT-PCR system (Bio-Rad). Data analysis  
830 was performed with CFXManager™ software (Bio-Rad). The expression level  
831 of each gene is normalized to human  $\beta$ -actin (Actin, Forward-  
832 5'ATGTGGCCGAGGACTTTGATT 3' and Reverse- 5'  
833 AGTGGGGTGGCTTTTAGGATG 3') gene.

834

### 835 **Isolation and purification of exosomes**

836 Exosomes were isolated and purified using ultrafiltration and exosome  
837 precipitation technique as described previously [90, 91]. Briefly, ~60 million  
838 RAW264.7 macrophages were cultured (6 million cells per 100 mm cell  
839 culture dish) in cell culture dishes as described before [86] followed by  
840 infection at moi 10 with *Mtb*, Hk-*Mtb*, Jal 1934 (MDR), MYC 431 (XDR) or left  
841 uninfected. After infection, cells were washed thoroughly with 1X PBS and  
842 incubated in serum free DMEM (Cell Clone) at 37 °C and 5% CO<sub>2</sub>. Serum free  
843 media was used cells to avoid contamination of exosomes present in the FBS  
844 exosomes in the exosomes purified from macrophages infected with *Mtb*.  
845 Culture supernatants were collected 24 h post infection (p.i.) and were  
846 centrifuged at 5000 rpm for 15 min at 4 °C to remove cells, cell debris or any  
847 *Mtb* in supernatant. Cleared culture supernatants were filtered twice through  
848 0.22  $\mu$ m polyethersulphone (PES) filters (Jet Biofil™). Exosomes are 30-100  
849 nm in diameter and filter freely through 0.22  $\mu$ m filters. Filtered supernatants  
850 were concentrated to 1 ml using an Amicon Ultra-15 (Merck) with a 100 kDa  
851 molecular weight cut off (MWCO) in a swing-out rotor (Thermo scientific™ SL

852 16) at 4 °C and 4000 × g. An equal volume of ExoQuick (Systems  
853 BioSciences Inc. CA), exosome precipitation solution, was added to  
854 concentrated culture supernatant, and the resulting solution was mixed by  
855 inverting the tube and allowing it to stand overnight at 4 °C. This mixture was  
856 then centrifuged at 1500 × g for 30 min. The supernatant was discarded, and  
857 the precipitate consisted of exosomes was then re-suspended in sterile 1 ×  
858 PBS (filtered through 0.22 µm filter) mixed with protease inhibitor cocktail  
859 (Pierce™ Thermo Fisher Scientific) and were stored at -80 °C for future  
860 analysis.

861

#### 862 **Mouse infection and isolation of exosomes from serum and lungs**

863 6 to 8 week old BALB/c mice were infected with *Mtb* by aerosol with  
864 ~100 bacilli per mouse or left uninfected as described previously [92]. At 20  
865 weeks p.i., animals were sacrificed and serum and lungs were collected.  
866 Exosomes were isolated from mouse serum by precipitating in ExoQuick  
867 solution overnight as per manufacturer's instruction.

868

869 To isolate exosomes from lungs, 2ml of tissue digestion mix (Serum  
870 free RPMI with 200 µg/ml Liberase DL [Sigma-Aldrich] and 100 µg/ml of  
871 DNase [Thermo Fisher scientific]) was added to one whole lung and  
872 transferred to C-tubes. Lungs were homogenised on gentleMACS™  
873 Dissociator (Miltenyi Biotec) using machine program m\_lung\_01. Samples  
874 were incubated for 30 min at 37 °C, 70-100 rpm followed by further  
875 homogenizing lungs using machine program m\_lung\_02 for 22 sec. Lung  
876 homogenates were passed through 40 µm cell strainer and centrifuged at

877 1500 rpm for 5 min. Supernatants were collected and passed through 0.22  $\mu$ m  
878 filter. Filtered supernatants were concentrated to 1 mL and exosomes were  
879 isolated using ExoQuick precipitation solution as described in above section.  
880 Exosomes were stored in -80 °C for future analysis.

881

## 882 **Western blotting**

883 Exosome were lysed in RIPA buffer (25mM tris-HCl pH 7.6, 150 mM  
884 NaCl, 1% NP-40, 1% sodium deoxycholate and 0.1% SDS) with protease  
885 inhibitor (Pierce<sup>TM</sup> Thermo Scientific). Protein estimation was performed using  
886 micro BCA assay (Pierce<sup>TM</sup> Thermo Fisher Scientific). 50  $\mu$ g of protein unless  
887 specified was mixed with Laemmli buffer, heated at 95 °C for 5 min followed  
888 by chilling on ice for 5 min before loading onto SDS-PAGE gel. Western  
889 blotting was performed using LAMP2 (ab25631), Rab5b (BD-610281), Alix  
890 (CST-2171), CD63 (sc-15363), p24 (ab9071),  $\alpha$ -Tubulin (CST-2144) as  
891 primary antibodies and goat anti-Rabbit IgG HRP (CST-7074) and horse anti-  
892 mouse IgG (CST-7076) were used as secondary antibodies.

893

## 894 **Transmission electron microscopy**

895 Exosomes were fixed in 4% PFA for 10 min and 10  $\mu$ l sample was  
896 mounted onto a carbon formvar coated copper grid. The samples were  
897 allowed to adsorb on grids for 10 min to form a monolayer and the remaining  
898 sample was wiped off using a clean filter paper. Grids were washed thrice  
899 with 1X PBS followed by incubation in 50  $\mu$ l drop of 1% glutaraldehyde for 5  
900 min. Grids were washed thoroughly with 1X PBS and stained with 2  $\mu$ l of

901 filtered 2% uranyl acetate solution for 1 min. After washing thrice with 1X PBS  
902 grids were dried at room temperature.

903

904 For immunogold labelling of exosomes with anti-CD63 antibody,  
905 exosomes were fixed in 4% PFA. Fixed exosome samples were mounted on  
906 carbon formvar coated 300 mesh copper grids for 10 min before wiping  
907 excess using filter paper. Grids were blocked in 0.5% bovine serum albumin  
908 (BSA) in 1X PBS (blocking buffer) for 30 min and washed thrice in 1X PBS.  
909 After this, grids were incubated in blocking buffer (negative control) or primary  
910 antibody (CD63) diluted to 1:100 for 1 h. Grids were washed thoroughly with  
911 1X PBS followed by incubation with anti-rabbit 10 nm gold antibody (ab27234)  
912 diluted to 1:250 for 1h. Grids were then incubated in 1% glutaraldehyde for 5  
913 min to fix the immunoreaction. Negative staining was performed using 2%  
914 aqueous uranyl acetate solution for 1 min. After washing grids were air dried  
915 and viewed with JEM 1011 transmission electron microscope at 120kV.

916

### 917 **NanoString gene array**

918 U1 cells were treated with 100 µg/ml concentration of exosomes for 12  
919 h and total RNA was isolated using RNeasy mini kit (Qiagen) according to the  
920 manufacturer's instructions. RNA concentration and purity were measured  
921 using a Nanodrop Spectrophotometer (Thermo Fisher Scientific, Waltham,  
922 MA). nCounter Gene Expression Assay was performed according to the  
923 manufacturer's protocol. The assay utilized a custom made NanoString  
924 codeset designed to measure 185 transcripts which includes 6 putative  
925 housekeeping transcripts (see table S1a). This custom-made panel includes

926 genes reported to change expression in response to HIV infection and  
927 oxidative stress. The data was normalized to the average counts for all  
928 housekeeping genes in each sample and analysed in nSolver software  
929 (NanoString Technologies).

930

### 931 **OCR measurement**

932 Oxygen consumption rate (OCR) was measured at 37 °C using  
933 Seahorse XFp extracellular flux analyser (Seahorse Bioscience). XF cell  
934 culture microplate plates were coated with 10 µl of Cell-Tak (Sigma-Aldrich)  
935 reagent according to the manufacturer's protocol. U1 cells were treated with  
936 exosomes isolated from *Mtb*, Hk-*mtb* infected or uninfected RAW264.7  
937 macrophages at 100 µg/ml concentration for 48 h. After 48 h U1 cells were  
938 washed and seeded in Seahorse flux analyser microplate pre-coated with  
939 Cell-Tak at density of 50000 cells per well to generate a confluent monolayer  
940 of cells. Agilent seahorse XFp cell mito stress kit (Agilent Technologies) was  
941 utilized to carry out mitochondrial respiration assay. Briefly, three OCR  
942 measurements were performed in XF assay media without addition of any  
943 inhibitor to measure basal respiration, followed by sequential exposure of cells  
944 to oligomycin (1 µM), an ATP synthase inhibitor and three OCR  
945 measurements to determine the ATP-linked OCR and proton leak. Then,  
946 cyanide-4-[trifluoromethoxy]phenylhydrazine (FCCP; 0.25 µM), an Electron  
947 transport chain (ETC) uncoupler was injected to determine the maximal  
948 respiration and the spare respiratory capacity (SRC). Lastly, antimycin A and  
949 rotenone (0.5 µM each) inhibitor of complex III and I; respectively, were  
950 injected to completely shut down the ETC to determine non-mitochondrial

951 respiration. The Wave Desktop 2.6 Software from Agilent website  
952 ([https://www.agilent.com/en/products/cell-analysis/software-download-for-](https://www.agilent.com/en/products/cell-analysis/software-download-for-wave-desktop)  
953 [wave-desktop](https://www.agilent.com/en/products/cell-analysis/software-download-for-wave-desktop)) was used for the calculation of the parameters from  
954 mitochondrial respiration assay. Data was normalized according to protocol  
955 described previously [93].

956

### 957 **Proteomic analysis of exosomes by LC-MS/MS**

958

959 We extracted proteins from exosomes as described previously for the  
960 immuno-blotting experiment. Protein samples (30 µg) were resolved on 10%  
961 SDS-PAGE gel up to a distance of 3 cm and stained with Coomassie Brilliant  
962 Blue R250. The lanes were cut into three equal size bands. These bands  
963 were first reduced with 5mM Tris (2-carboxyethyl) phosphine hydrochloride  
964 (TCEP; Sigma- Aldrich) followed by alkylation with 50 mM iodoacetamide and  
965 digested with 1µg trypsin for as long as 16 hours at 37 °C. The digests were  
966 then cleaned up using C18 silica cartridge (The Nest Group, Southborough,  
967 MA) and dried using speed vac which then was resuspended in Buffer A (5 %  
968 acetonitrile / 0.1 % formic acid).

969

970 EASY-nLC 1000 system (Thermo Fisher Scientific) was used to  
971 perform LC-MS/MS, coupled to QExactive mass spectrometer (Thermo Fisher  
972 Scientific) fitted with nanoelectrospray ion source. 15cm Pico-Frit filled with  
973 1.8 µm of C18 resin (Dr. Maeisch) was used to load and resolve 1 µg of the  
974 peptide mixture with Buffer A. Loading and elution with 0-40% gradient of  
975 Buffer B (95% acetonitrile/0.1% Formic acid) was given a flow rate of 300  
976 nl/min and RT of 105 minutes. The MS was driven with a full scan resolution

977 of 70,000 at m/z of 400 and the MS/MS scans were acquired at a resolution of  
978 17,500 at m/z of 400 using Top10 HCD Data-dependant acquisition mode.  
979 Polydimethylcyclosiloxane (PCM) ions (m/z = 445.120025) was set up as lock  
980 mass option for internal recalibration during the run. MS Data acquisition  
981 was carried out using a Data-dependent Top10 method, which effectively  
982 chooses most abundant precursor ions from a survey scan.

983

984 Raw files were analyzed using Thermo Proteome Discoverer 2.2  
985 searched against Uniprot Mus musculus reference proteome database with  
986 both PSM (peptide spectrum matches) and protein FDR set to 0.01 using  
987 percolator node. For Sequest HT search, the precursor and fragment mass  
988 tolerances were set at 10 ppm and 0.5 Da, respectively. Protein quantification  
989 was done using Minora feature detector node with default settings and  
990 considering only high PSM (peptide spectrum matches) confidence.

991

## 992 **Data processing and analysis**

993 Differential analysis was performed on Label-free quantification data  
994 using R packages- ProstaR and DAPAR. The intensity values were log-  
995 transformed followed by filtering of rows containing  $NA \geq 5$  in the data.  
996 Imputation was performed using R package-Mice. Limma-moderated t-test  
997 was used to identify differentially expressed proteins and p values were  
998 adjusted using BH method, between two groups. All proteins with fold change  
999  $>2$  or  $<-2$  and with  $pvalue < 0.01$  were considered significant. Functional  
1000 classification of differentially expressed proteins with GO and KEGG signalling  
1001 pathway between two groups were analyzed using R package-clusterProfiler.



1002

### 1003 **Statistical analysis**

1004           Statistical analyses were performed using the GraphPad Prism  
1005 software. Statistical analyses were performed using Student's *t*-tests (two-  
1006 tailed). Comparisons of multiple groups were made by either using one-way or  
1007 two-way ANOVA with Bonferroni multiple comparisons. Differences with  
1008 a *p* value of < 0.05 were considered significant.

1009

### 1010 **Ethics statement**

1011           This study was carried out in strict accordance with the guidelines  
1012 provided by the Committee for the Purpose of Control and Supervision on  
1013 Experiments on Animals (CPCSEA), Government of India. The protocol was  
1014 approved by the Animal Ethics Committee (AEC) of Indian Institute of Science  
1015 (#CAF/Ethics/485/2016).

1016

### 1017 **Acknowledgments**

1018           This work was supported by the Wellcome trust-DBT India Alliance  
1019 grant IA/S/16/2/502700 (AS), and in part by Department of Biotechnology  
1020 (DBT) Grant BT/PR11911/BRB/10/1327/2014, BT/PR13522/COE/34/27/2015  
1021 (AS), DBT-IISc Partnership Program (22-0905-0006-05- 987 436) and Infosys  
1022 foundation. AS is a senior fellow of Wellcome trust-DBT India Alliance. PT and  
1023 VKP acknowledge fellowships from CSIR and IISc, respectively.

1024

1025

1026

1027

1028

1029 **References**

- 1030 1. Whalen, C., et al., *Accelerated course of human immunodeficiency virus*  
1031 *infection after tuberculosis*. Am J Respir Crit Care Med, 1995. **151**(1): p.  
1032 129-35.
- 1033 2. Kwan, C.K. and J.D. Ernst, *HIV and tuberculosis: a deadly human syndemic*.  
1034 Clin Microbiol Rev, 2011. **24**(2): p. 351-76.
- 1035 3. DeRiemer, K., et al., *Quantitative impact of human immunodeficiency virus*  
1036 *infection on tuberculosis dynamics*. Am J Respir Crit Care Med, 2007.  
1037 **176**(9): p. 936-44.
- 1038 4. Nusbaum, R.J., et al., *Pulmonary Tuberculosis in Humanized Mice Infected*  
1039 *with HIV-1*. Sci Rep, 2016. **6**: p. 21522.
- 1040 5. Mwandumba, H.C., et al., *Mycobacterium tuberculosis resides in*  
1041 *nonacidified vacuoles in endocytically competent alveolar macrophages*  
1042 *from patients with tuberculosis and HIV infection*. J Immunol, 2004.  
1043 **172**(7): p. 4592-8.
- 1044 6. Kalsdorf, B., et al., *HIV-1 infection impairs the bronchoalveolar T-cell*  
1045 *response to mycobacteria*. Am J Respir Crit Care Med, 2009. **180**(12): p.  
1046 1262-70.
- 1047 7. Diedrich, C.R. and J.L. Flynn, *HIV-1/mycobacterium tuberculosis coinfection*  
1048 *immunology: how does HIV-1 exacerbate tuberculosis?* Infect Immun, 2011.  
1049 **79**(4): p. 1407-17.
- 1050 8. Bafica, A., et al., *Cutting edge: in vivo induction of integrated HIV-1*  
1051 *expression by mycobacteria is critically dependent on Toll-like receptor 2*. J  
1052 Immunol, 2003. **171**(3): p. 1123-7.
- 1053 9. Toossi, Z., et al., *Increased replication of HIV-1 at sites of Mycobacterium*  
1054 *tuberculosis infection: potential mechanisms of viral activation*. J Acquir  
1055 Immune Defic Syndr, 2001. **28**(1): p. 1-8.
- 1056 10. Lederman, M.M., et al., *Mycobacterium tuberculosis and its purified protein*  
1057 *derivative activate expression of the human immunodeficiency virus*. J  
1058 Acquir Immune Defic Syndr, 1994. **7**(7): p. 727-33.
- 1059 11. Zhang, Y., et al., *Mycobacterium tuberculosis enhances human*  
1060 *immunodeficiency virus-1 replication by transcriptional activation at the*  
1061 *long terminal repeat*. J Clin Invest, 1995. **95**(5): p. 2324-31.
- 1062 12. Bernier, R., et al., *Mycobacterium tuberculosis mannose-capped*  
1063 *lipoarabinomannan can induce NF-kappaB-dependent activation of human*  
1064 *immunodeficiency virus type 1 long terminal repeat in T cells*. J Gen Virol,  
1065 1998. **79 ( Pt 6)**: p. 1353-61.
- 1066 13. Souriant, S., et al., *Tuberculosis Exacerbates HIV-1 Infection through IL-*  
1067 *10/STAT3-Dependent Tunneling Nanotube Formation in Macrophages*. Cell  
1068 Rep, 2019. **26**(13): p. 3586-3599 e7.
- 1069 14. Goletti, D., et al., *Inhibition of HIV-1 replication in monocyte-derived*  
1070 *macrophages by Mycobacterium tuberculosis*. J Infect Dis, 2004. **189**(4): p.  
1071 624-33.
- 1072 15. Ranjbar, S., et al., *HIV-1 replication is differentially regulated by distinct*  
1073 *clinical strains of Mycobacterium tuberculosis*. PLoS One, 2009. **4**(7): p.  
1074 e6116.

- 1075 16. Perl, A. and K. Banki, *Genetic and metabolic control of the mitochondrial*  
1076 *transmembrane potential and reactive oxygen intermediate production in*  
1077 *HIV disease*. *Antioxid Redox Signal*, 2000. **2**(3): p. 551-73.
- 1078 17. Herzenberg, L.A., et al., *Glutathione deficiency is associated with impaired*  
1079 *survival in HIV disease*. *Proc Natl Acad Sci U S A*, 1997. **94**(5): p. 1967-72.
- 1080 18. Peterson, J.D., et al., *Glutathione levels in antigen-presenting cells modulate*  
1081 *Th1 versus Th2 response patterns*. *Proc Natl Acad Sci U S A*, 1998. **95**(6): p.  
1082 3071-6.
- 1083 19. De Rosa, S.C., et al., *N-acetylcysteine replenishes glutathione in HIV*  
1084 *infection*. *Eur J Clin Invest*, 2000. **30**(10): p. 915-29.
- 1085 20. Bhaskar, A., et al., *Measuring glutathione redox potential of HIV-1-infected*  
1086 *macrophages*. *J Biol Chem*, 2015. **290**(2): p. 1020-38.
- 1087 21. Guerra, C., et al., *Glutathione and adaptive immune responses against*  
1088 *Mycobacterium tuberculosis infection in healthy and HIV infected*  
1089 *individuals*. *PLoS One*, 2011. **6**(12): p. e28378.
- 1090 22. Palanisamy, G.S., et al., *Evidence for oxidative stress and defective*  
1091 *antioxidant response in guinea pigs with tuberculosis*. *PLoS One*, 2011.  
1092 **6**(10): p. e26254.
- 1093 23. Cumming, B.M., et al., *Mycobacterium tuberculosis induces decelerated*  
1094 *bioenergetic metabolism in human macrophages*. *Elife*, 2018. **7**.
- 1095 24. Gutscher, M., et al., *Real-time imaging of the intracellular glutathione redox*  
1096 *potential*. *Nat Methods*, 2008. **5**(6): p. 553-9.
- 1097 25. Choi, H.H., et al., *Endoplasmic reticulum stress response is involved in*  
1098 *Mycobacterium tuberculosis protein ESAT-6-mediated apoptosis*. *FEBS Lett*,  
1099 **584**(11): p. 2445-54.
- 1100 26. Shenoi, S., et al., *Multidrug-resistant and extensively drug-resistant*  
1101 *tuberculosis: consequences for the global HIV community*. *Curr Opin Infect*  
1102 *Dis*, 2009. **22**(1): p. 11-7.
- 1103 27. Wells, C.D., et al., *HIV infection and multidrug-resistant tuberculosis: the*  
1104 *perfect storm*. *J Infect Dis*, 2007. **196** **Suppl 1**: p. S86-107.
- 1105 28. Kumar, D., et al., *Genome-wide analysis of the host intracellular network*  
1106 *that regulates survival of Mycobacterium tuberculosis*. *Cell*, 2010. **140**(5):  
1107 p. 731-43.
- 1108 29. Jordan, A., D. Bisgrove, and E. Verdin, *HIV reproducibly establishes a latent*  
1109 *infection after acute infection of T cells in vitro*. *EMBO J*, 2003. **22**(8): p.  
1110 1868-77.
- 1111 30. Folks, T.M., et al., *Cytokine-induced expression of HIV-1 in a chronically*  
1112 *infected promonocyte cell line*. *Science*, 1987. **238**(4828): p. 800-2.
- 1113 31. Poli, G., et al., *Tumor necrosis factor alpha functions in an autocrine manner*  
1114 *in the induction of human immunodeficiency virus expression*. *Proc Natl*  
1115 *Acad Sci U S A*, 1990. **87**(2): p. 782-5.
- 1116 32. Kurosaka, K., N. Watanabe, and Y. Kobayashi, *Production of*  
1117 *proinflammatory cytokines by phorbol myristate acetate-treated THP-1*  
1118 *cells and monocyte-derived macrophages after phagocytosis of apoptotic*  
1119 *CTLL-2 cells*. *J Immunol*, 1998. **161**(11): p. 6245-9.
- 1120 33. Bhatnagar, S., et al., *Exosomes released from macrophages infected with*  
1121 *intracellular pathogens stimulate a proinflammatory response in vitro and*  
1122 *in vivo*. *Blood*, 2007. **110**(9): p. 3234-44.

- 1123 34. Chan, J.K. and W.C. Greene, *NF-kappaB/Rel: agonist and antagonist roles in*  
1124 *HIV-1 latency*. *Curr Opin HIV AIDS*, 2011. **6**(1): p. 12-8.
- 1125 35. Essandoh, K., et al., *Blockade of exosome generation with GW4869 dampens*  
1126 *the sepsis-induced inflammation and cardiac dysfunction*. *Biochim Biophys*  
1127 *Acta*, 2015. **1852**(11): p. 2362-71.
- 1128 36. Perez, V.L., et al., *An HIV-1-infected T cell clone defective in IL-2 production*  
1129 *and Ca<sup>2+</sup> mobilization after CD3 stimulation*. *J Immunol*, 1991. **147**(9): p.  
1130 3145-8.
- 1131 37. Singh, P.P., et al., *Exosomes isolated from mycobacteria-infected mice or*  
1132 *cultured macrophages can recruit and activate immune cells in vitro and in*  
1133 *vivo*. *J Immunol*, 2012. **189**(2): p. 777-85.
- 1134 38. Booth, A.M., et al., *Exosomes and HIV Gag bud from endosome-like domains*  
1135 *of the T cell plasma membrane*. *J Cell Biol*, 2006. **172**(6): p. 923-35.
- 1136 39. Lee, Y., S. El Andaloussi, and M.J. Wood, *Exosomes and microvesicles:*  
1137 *extracellular vesicles for genetic information transfer and gene therapy*.  
1138 *Hum Mol Genet*, 2012. **21**(R1): p. R125-34.
- 1139 40. Staal, F.J., et al., *Intracellular thiols regulate activation of nuclear factor*  
1140 *kappa B and transcription of human immunodeficiency virus*. *Proc Natl*  
1141 *Acad Sci U S A*, 1990. **87**(24): p. 9943-7.
- 1142 41. Pyo, C.W., et al., *Reactive oxygen species activate HIV long terminal repeat*  
1143 *via post-translational control of NF-kappaB*. *Biochem Biophys Res*  
1144 *Commun*, 2008. **376**(1): p. 180-5.
- 1145 42. Kulkarni, M.M., *Digital multiplexed gene expression analysis using the*  
1146 *NanoString nCounter system*. *Curr Protoc Mol Biol*, 2011. **Chapter 25**: p.  
1147 Unit25B 10.
- 1148 43. Salzano, S., et al., *Linkage of inflammation and oxidative stress via release of*  
1149 *glutathionylated peroxiredoxin-2, which acts as a danger signal*. *Proc Natl*  
1150 *Acad Sci U S A*, 2014. **111**(33): p. 12157-62.
- 1151 44. Volonte, D. and F. Galbiati, *Inhibition of thioredoxin reductase 1 by caveolin*  
1152 *1 promotes stress-induced premature senescence*. *EMBO Rep*, 2009.  
1153 **10**(12): p. 1334-40.
- 1154 45. Yang, X., et al., *Mn Inhibits GSH Synthesis via Downregulation of Neuronal*  
1155 *EAAC1 and Astrocytic xCT to Cause Oxidative Damage in the Striatum of*  
1156 *Mice*. *Oxid Med Cell Longev*, 2018. **2018**: p. 4235695.
- 1157 46. Lee, J.H., et al., *Ferritin binds and activates p53 under oxidative stress*.  
1158 *Biochem Biophys Res Commun*, 2009. **389**(3): p. 399-404.
- 1159 47. Gill, A.J., et al., *Heme oxygenase-1 promoter region (GT)<sub>n</sub> polymorphism*  
1160 *associates with increased neuroimmune activation and risk for encephalitis*  
1161 *in HIV infection*. *J Neuroinflammation*, 2018. **15**(1): p. 70.
- 1162 48. Gao, Y., et al., *Activation of the selenoprotein SEPS1 gene expression by pro-*  
1163 *inflammatory cytokines in HepG2 cells*. *Cytokine*, 2006. **33**(5): p. 246-51.
- 1164 49. Nakamura, K., et al., *PB1 domain interaction of p62/sequestosome 1 and*  
1165 *MEKK3 regulates NF-kappaB activation*. *J Biol Chem*, 2010. **285**(3): p.  
1166 2077-89.
- 1167 50. Roebuck, K.A., D.S. Gu, and M.F. Kagnoff, *Activating protein-1 cooperates*  
1168 *with phorbol ester activation signals to increase HIV-1 expression*. *AIDS*,  
1169 1996. **10**(8): p. 819-26.
- 1170 51. Mamik, M.K. and A. Ghorpade, *Chemokine CXCL8 promotes HIV-1*  
1171 *replication in human monocyte-derived macrophages and primary*

- 1172 *microglia via nuclear factor-kappaB pathway*. PLoS One, 2014. **9**(3): p.  
1173 e92145.
- 1174 52. Ansari, A.W., A. Kamarulzaman, and R.E. Schmidt, *Multifaceted Impact of*  
1175 *Host C-C Chemokine CCL2 in the Immuno-Pathogenesis of HIV-1/M.*  
1176 *tuberculosis Co-Infection*. Front Immunol, 2013. **4**: p. 312.
- 1177 53. Albin, J.S. and R.S. Harris, *Interactions of host APOBEC3 restriction factors*  
1178 *with HIV-1 in vivo: implications for therapeutics*. Expert Rev Mol Med,  
1179 2010. **12**: p. e4.
- 1180 54. Sadler, H.A., et al., *APOBEC3G contributes to HIV-1 variation through*  
1181 *sublethal mutagenesis*. J Virol, 2010. **84**(14): p. 7396-404.
- 1182 55. Toossi, Z., et al., *Short Communication: Expression of APOBEC3G and*  
1183 *Interferon Gamma in Pleural Fluid Mononuclear Cells from HIV/TB Dual*  
1184 *Infected Subjects*. AIDS Res Hum Retroviruses, 2015. **31**(7): p. 692-5.
- 1185 56. Santos, S., et al., *Virus-producing cells determine the host protein profiles of*  
1186 *HIV-1 virion cores*. Retrovirology, 2012. **9**: p. 65.
- 1187 57. Hegedus, A., M. Kavanagh Williamson, and H. Huthoff, *HIV-1 pathogenicity*  
1188 *and virion production are dependent on the metabolic phenotype of*  
1189 *activated CD4+ T cells*. Retrovirology, 2014. **11**: p. 98.
- 1190 58. Chacko, B.K., et al., *The Bioenergetic Health Index: a new concept in*  
1191 *mitochondrial translational research*. Clin Sci (Lond), 2014. **127**(6): p.  
1192 367-73.
- 1193 59. Schorey, J.S., et al., *Exosomes and other extracellular vesicles in host-*  
1194 *pathogen interactions*. EMBO Rep, 2015. **16**(1): p. 24-43.
- 1195 60. Cheng, Y. and J.S. Schorey, *Extracellular vesicles deliver Mycobacterium*  
1196 *RNA to promote host immunity and bacterial killing*. EMBO Rep, 2019.  
1197 **20**(3).
- 1198 61. Rottenberg, D.A., et al., *Abnormal cerebral glucose metabolism in HIV-1*  
1199 *seropositive subjects with and without dementia*. J Nucl Med, 1996. **37**(7):  
1200 p. 1133-41.
- 1201 62. Palmer, C.S., et al., *Glucose Metabolism in T Cells and Monocytes: New*  
1202 *Perspectives in HIV Pathogenesis*. EBioMedicine, 2016. **6**: p. 31-41.
- 1203 63. Townsend, D.M., K.D. Tew, and H. Tapiero, *Sulfur containing amino acids*  
1204 *and human disease*. Biomed Pharmacother, 2004. **58**(1): p. 47-55.
- 1205 64. Rao, S., et al., *Host mRNA decay proteins influence HIV-1 replication and*  
1206 *viral gene expression in primary monocyte-derived macrophages*.  
1207 Retrovirology, 2019. **16**(1): p. 3.
- 1208 65. Kok, Y.L., et al., *Spontaneous reactivation of latent HIV-1 promoters is*  
1209 *linked to the cell cycle as revealed by a genetic-insulators-containing dual-*  
1210 *fluorescence HIV-1-based vector*. Sci Rep, 2018. **8**(1): p. 10204.
- 1211 66. Felty, Q., et al., *Estrogen-induced mitochondrial reactive oxygen species as*  
1212 *signal-transducing messengers*. Biochemistry, 2005. **44**(18): p. 6900-9.
- 1213 67. Das, B., et al., *Estrogen receptor-1 is a key regulator of HIV-1 latency that*  
1214 *imparts gender-specific restrictions on the latent reservoir*. Proc Natl Acad  
1215 Sci U S A, 2018. **115**(33): p. E7795-E7804.
- 1216 68. Duette, G., et al., *Induction of HIF-1alpha by HIV-1 Infection in CD4(+) T*  
1217 *Cells Promotes Viral Replication and Drives Extracellular Vesicle-Mediated*  
1218 *Inflammation*. MBio, 2018. **9**(5).
- 1219 69. Anand, P.K., et al., *Exosomal Hsp70 induces a pro-inflammatory response to*  
1220 *foreign particles including mycobacteria*. PLoS One, 2010. **5**(4): p. e10136.

- 1221 70. Anderson, I., et al., *Heat shock protein 90 controls HIV-1 reactivation from*  
1222 *latency*. Proc Natl Acad Sci U S A, 2014. **111**(15): p. E1528-37.
- 1223 71. Abdel-Mohsen, M., et al., *Human Galectin-9 Is a Potent Mediator of HIV*  
1224 *Transcription and Reactivation*. PLoS Pathog, 2016. **12**(6): p. e1005677.
- 1225 72. Aalinkeel, R., et al., *Galectin-1 Reduces Neuroinflammation via Modulation*  
1226 *of Nitric Oxide-Arginase Signaling in HIV-1 Transfected Microglia: a Gold*  
1227 *Nanoparticle-Galectin-1 "Nanoplex" a Possible Neurotherapeutic?* J  
1228 Neuroimmune Pharmacol, 2017. **12**(1): p. 133-151.
- 1229 73. Chaudhuri, A., et al., *STAT1 signaling modulates HIV-1-induced*  
1230 *inflammatory responses and leukocyte transmigration across the blood-*  
1231 *brain barrier*. Blood, 2008. **111**(4): p. 2062-72.
- 1232 74. Tjernlund, A., et al., *Leukemia inhibitor factor (LIF) inhibits HIV-1*  
1233 *replication via restriction of stat 3 activation*. AIDS Res Hum Retroviruses,  
1234 2007. **23**(3): p. 398-406.
- 1235 75. Barondes, S.H., et al., *Galectins: a family of animal beta-galactoside-binding*  
1236 *lectins*. Cell, 1994. **76**(4): p. 597-8.
- 1237 76. Alvarez-Jimenez, V.D., et al., *Extracellular Vesicles Released from*  
1238 *Mycobacterium tuberculosis-Infected Neutrophils Promote Macrophage*  
1239 *Autophagy and Decrease Intracellular Mycobacterial Survival*. Front  
1240 Immunol, 2018. **9**: p. 272.
- 1241 77. Murphy, M.P., *How mitochondria produce reactive oxygen species*. Biochem  
1242 J, 2009. **417**(1): p. 1-13.
- 1243 78. Vilhardt, F., et al., *The HIV-1 Nef protein and phagocyte NADPH oxidase*  
1244 *activation*. J Biol Chem, 2002. **277**(44): p. 42136-43.
- 1245 79. Kim, C., J.Y. Kim, and J.H. Kim, *Cytosolic phospholipase A(2), lipoxygenase*  
1246 *metabolites, and reactive oxygen species*. BMB Rep, 2008. **41**(8): p. 555-9.
- 1247 80. Coffey, M.J., et al., *Granulocyte-macrophage colony-stimulating factor*  
1248 *upregulates reduced 5-lipoxygenase metabolism in peripheral blood*  
1249 *monocytes and neutrophils in acquired immunodeficiency syndrome*. Blood,  
1250 1999. **94**(11): p. 3897-905.
- 1251 81. Chen, C., et al., *Identification of a Novel Serum Biomarker for Tuberculosis*  
1252 *Infection in Chinese HIV Patients by iTRAQ-Based Quantitative Proteomics*.  
1253 Front Microbiol, 2018. **9**: p. 330.
- 1254 82. Banfer, S., et al., *Molecular mechanism to recruit galectin-3 into*  
1255 *multivesicular bodies for polarized exosomal secretion*. Proc Natl Acad Sci U  
1256 S A, 2018. **115**(19): p. E4396-E4405.
- 1257 83. Fulton, D.J.R., et al., *Galectin-3: A Harbinger of Reactive Oxygen Species,*  
1258 *Fibrosis, and Inflammation in Pulmonary Arterial Hypertension*. Antioxid  
1259 Redox Signal, 2019.
- 1260 84. Zhao, J., et al., *Secretion of IFN-gamma Associated with Galectin-9*  
1261 *Production by Pleural Fluid Cells from a Patient with Extrapulmonary*  
1262 *Tuberculosis*. Int J Mol Sci, 2017. **18**(7).
- 1263 85. Infante, J.R., et al., *Phase I dose-escalation studies of SNX-5422, an orally*  
1264 *bioavailable heat shock protein 90 inhibitor, in patients with refractory*  
1265 *solid tumours*. Eur J Cancer, 2014. **50**(17): p. 2897-904.
- 1266 86. Bhaskar, A., et al., *Reengineering redox sensitive GFP to measure mycothiol*  
1267 *redox potential of Mycobacterium tuberculosis during infection*. PLoS  
1268 Pathog, 2014. **10**(1): p. e1003902.

- 1269 87. Srivastava, M., et al., *Mediator responses of alveolar macrophages and*  
1270 *kinetics of mononuclear phagocyte subset recruitment during acute*  
1271 *primary and secondary mycobacterial infections in the lungs of mice.* Cell  
1272 Microbiol, 2007. **9**(3): p. 738-52.
- 1273 88. Malik, Z.A., G.M. Denning, and D.J. Kusner, *Inhibition of Ca(2+) signaling by*  
1274 *Mycobacterium tuberculosis is associated with reduced phagosome-*  
1275 *lysosome fusion and increased survival within human macrophages.* J Exp  
1276 Med, 2000. **191**(2): p. 287-302.
- 1277 89. Borghi, M.O., et al., *Interaction between chronically HIV-infected*  
1278 *promonocytic cells and human umbilical vein endothelial cells: role of*  
1279 *proinflammatory cytokines and chemokines in viral expression modulation.*  
1280 Clin Exp Immunol, 2000. **120**(1): p. 93-100.
- 1281 90. Zeringer, E., et al., *Strategies for isolation of exosomes.* Cold Spring Harb  
1282 Protoc, 2015. **2015**(4): p. 319-23.
- 1283 91. Li, P., et al., *Progress in Exosome Isolation Techniques.* Theranostics, 2017.  
1284 **7**(3): p. 789-804.
- 1285 92. Mishra, S., et al., *Efficacy of beta-lactam/beta-lactamase inhibitor*  
1286 *combination is linked to WhiB4-mediated changes in redox physiology of*  
1287 *Mycobacterium tuberculosis.* 2017. **6**.
- 1288 93. Yang, Y., et al., *Metabolic reprogramming for producing energy and*  
1289 *reducing power in fumarate hydratase null cells from hereditary*  
1290 *leiomyomatosis renal cell carcinoma.* PLoS One, 2013. **8**(8): p. e72179.  
1291

1292

1293

1294

1295

1296

1297

1298

1299

1300

1301

1302

1303

1304

1305

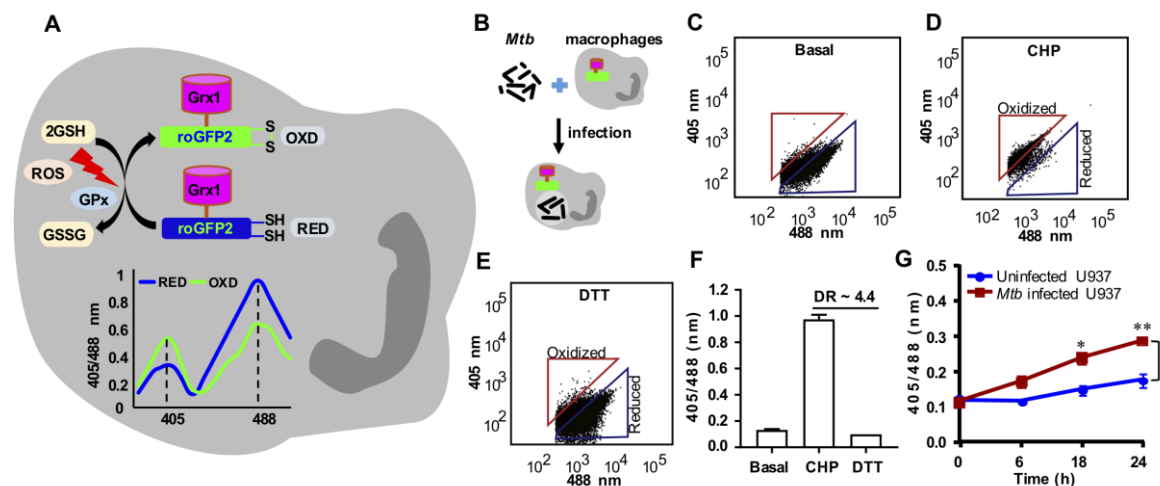

1306

1307 **Fig. 1. *Mycobacterium tuberculosis* (*Mtb*) induces oxidative shift in  $E_{GSH}$**

1308 **of U937 macrophages ( $M\phi$ ). (A) Schematic representation of Grx1-roGFP2**

1309 **oxidation and reduction in response to ROS inside a mammalian cell stably**

1310 **expressing the biosensor. GPx denotes GSH-dependent glutathione**

1311 **peroxidase. The graph represents the 405/488 nm ratios change upon**

1312 **oxidation or reduction of Grx1-roGFP2 in response to oxidative or reductive**

1313 **stress. Oxidative stress increases fluorescence at 405 nm excitation and**

1314 **decreases fluorescence at 488 nm at a constant emission of 510 nm, whereas**

1315 **an opposite biosensor response is induced by reductive stress. (B) PMA**

1316 **differentiated U937  $M\phi$  stably expressing Grx1-roGFP2 in the cytosol were**

1317 **infected with *Mtb* H37Rv at a multiplicity of infection (MOI) 10. At the indicated**

1318 **time points, ratiometric sensor response was measured by exciting the sensor**

1319 **at 405 and 488 nm lasers and at a constant emission of 510 nm using flow**

1320 **cytometer. Dot plot spectra showing the ratiometric shift in the biosensor**

1321 **response in case of (C) untreated U937 (basal) and upon treatment of with**

1322 **(D) an oxidant cumene hydroperoxide (CHP, 0.5 mM) and (E) a reductant**

1323 **dithiothreitol (DTT, 40 mM). (F) Dynamic range (DR) of the biosensor in U937**

1324 **cells based on the complete oxidation and reduction by CHP and DTT,**



1325 respectively. **(G)** Ratiometric biosensor response over time in case of  
1326 uninfected and *Mtb* infected U937 macrophages. Error bars represent  
1327 standard deviations from the mean. \* $p < 0.05$ ; \*\* $p < 0.01$  (two-way ANOVA).  
1328 Data are representative of at least three independent experiments performed  
1329 in triplicate.

1330

1331

1332

1333

1334

1335

1336

1337

1338

1339

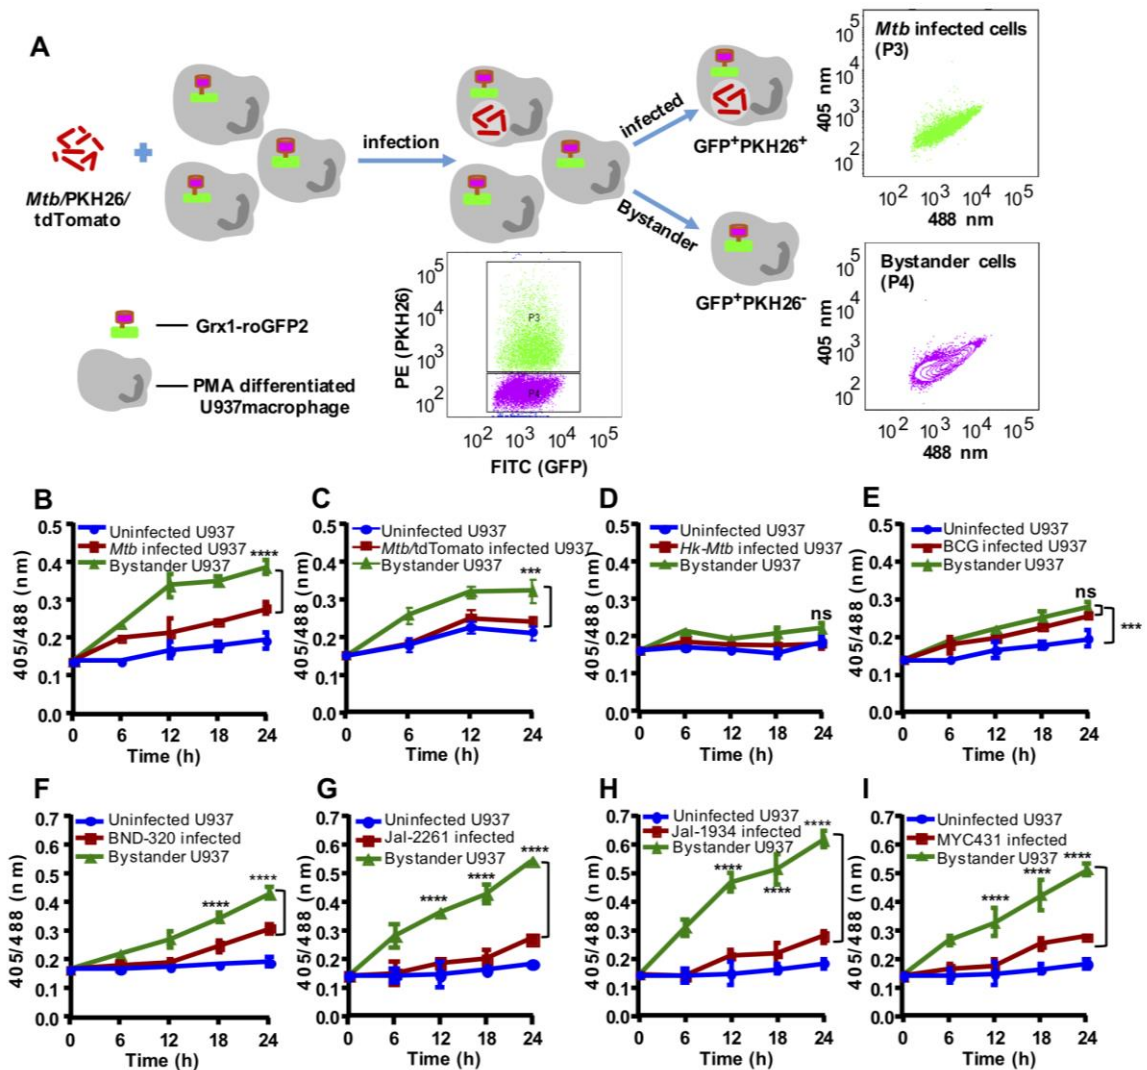

1340

1341 **Fig. 2. *Mycobacterium tuberculosis* (*Mtb*) induces higher oxidative shift**  
 1342 **in  $E_{GSH}$  of bystander as compared to infected U937 macrophages ( $M\phi$ ).**

1343 **(A)** The *Mtb* H37Rv bacilli were stained with a membrane staining dye PKH26  
 1344 and PMA differentiated U937/Grx1-roGFP2 cells were infected at MOI 10. The  
 1345 sensor response was measured by flow cytometry. Based on the PKH26  
 1346 fluorescence emitted by *Mtb* inside  $M\phi$ , the U937/Grx1-roGFP2  $M\phi$  were  
 1347 gated into infected (P3) or bystander subpopulations (P4) and the dot plot  
 1348 spectra of *Mtb* infected and bystander U937/Grx1-roGFP2 at 24 h is shown.

1349 **(B)** The line graph showing biosensor response at various time points in case  
 1350 of uninfected, *Mtb* infected, and bystander U937/Grx1-roGFP2. **(C)** *Mtb* stably

1351 expressing red fluorescent protein, tdTomato (*Mtb*/tdTomato) was used to  
1352 infect U937/Grx1-roGFP2 (MOI 10) and the biosensor response of uninfected,  
1353 infected and bystander cells was measured over time. Biosensor response of  
1354 infected and bystander U937/Grx1-roGFP2 cells upon infection with *PKH-26*  
1355 labeled **(D)** heat-killed *Mtb* (Hk-*Mtb*), **(E)** *M. bovis* BCG strain, drug resistant  
1356 clinical isolates of *Mtb* **(F)** BND-320, **(G)** Jal-2261, **(H)** Jal-1934 and **(I)** MYC-  
1357 431. Error bars represent standard deviations from the mean. \*\*\* $p < 0.001$ ; \*\*\*\*  
1358  $p < 0.0001$  (two-way ANOVA). Data are representative of at least three  
1359 independent experiments performed in triplicate.  
1360

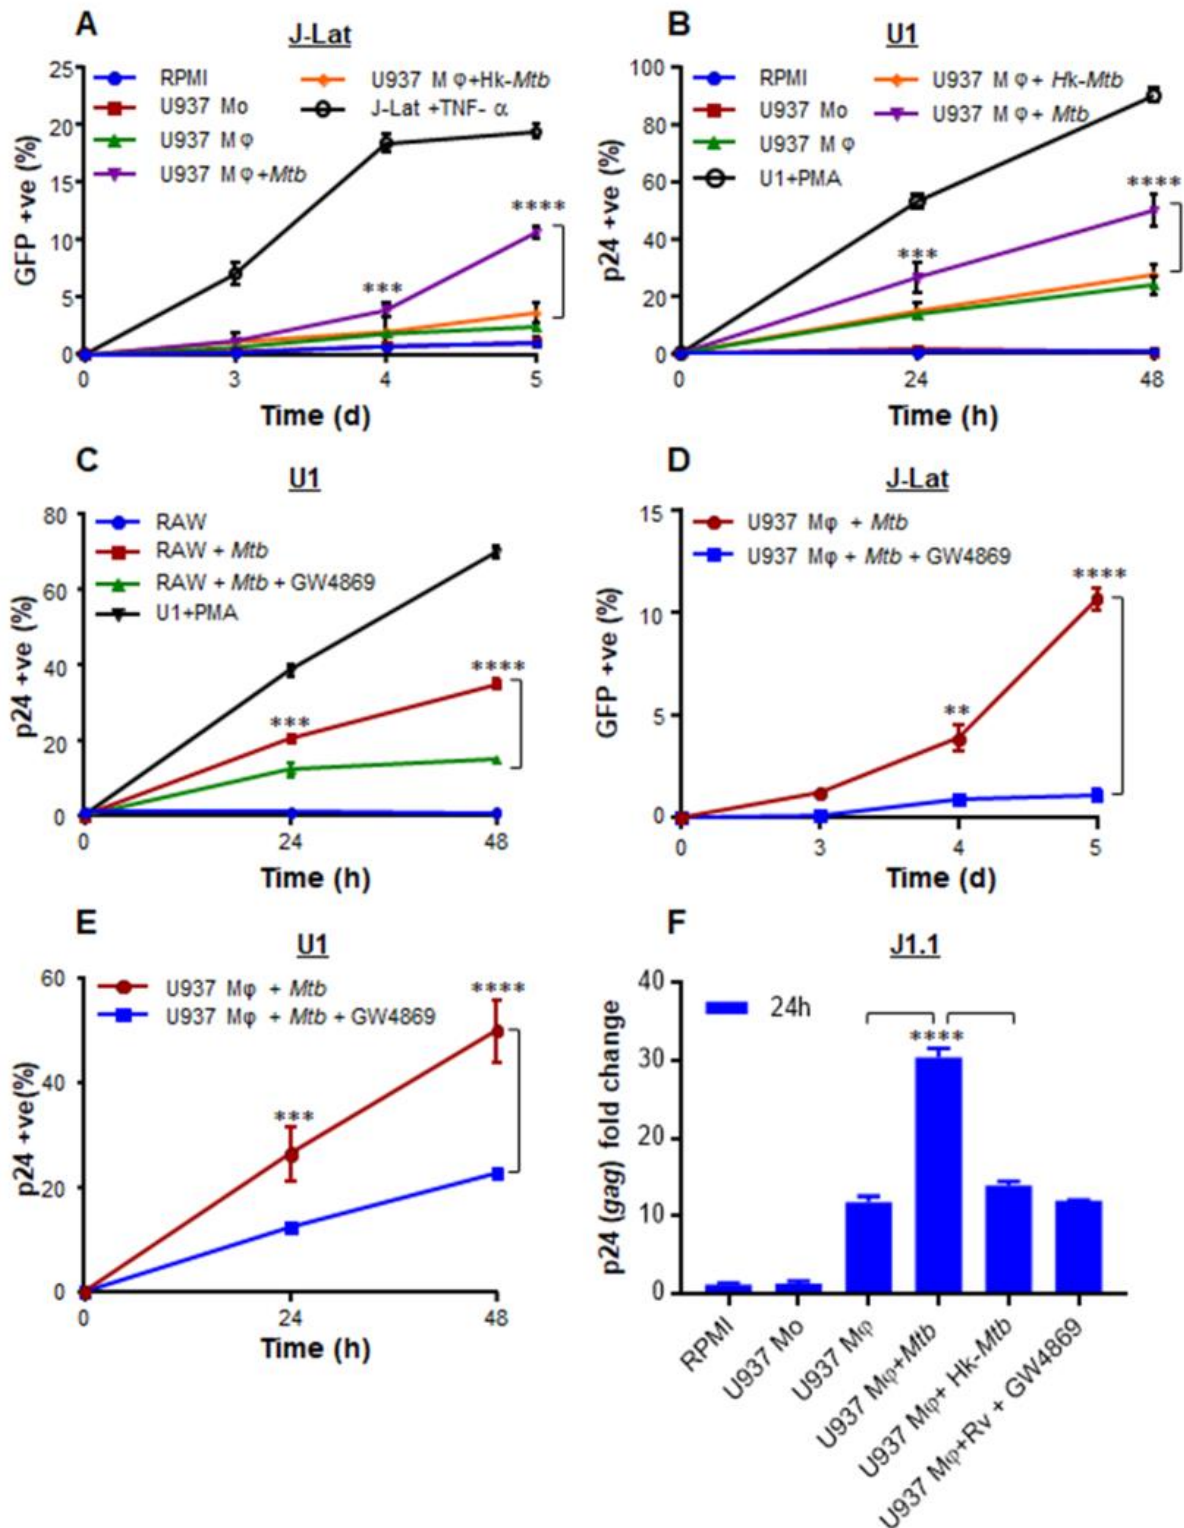

1361

1362 **Fig. 3. Culture supernatant derived from *Mtb* infected macrophages (Mφ)**

1363 **reactivates HIV-1.** We determined the influence of culture supernatant

1364 derived from *Mtb* infected Mφ on three latent cell lines of HIV-1: J-Lat, U1,

1365 and J1.1. The U937 M $\phi$  were infected with *Mtb* or Hk-*Mtb* (MOI 10). At 24 h  
1366 p.i., culture supernatant from the infected macrophages was collected, passed  
1367 through 0.2  $\mu$ m filter, and diluted in fresh RPMI medium (1:1, v/v). This  
1368 supernatant was used to culture J-Lat and U1 cells and HIV-1 reactivation  
1369 was monitored over time by measuring **(A)** GFP fluorescence in J-Lat and by  
1370 **(B)** p24 immuno-staining in U1 cells. As controls, we similarly monitored HIV-  
1371 1 reactivation from J-Lat and U1 cells, cultured in the supernatant derived  
1372 from U937 monocytes (mo) and PMA-differentiated U937 M $\phi$ . HIV-1  
1373 reactivation upon treatment of J-Lat and U1 with TNF $\alpha$  (10 ng/ml) and PMA (5  
1374 ng/ml), respectively, was taken as positive control. **(C)** HIV-1 reactivation in  
1375 U1 upon treatment with the supernatant derived from RAW264.7 M $\phi$  infected  
1376 with *Mtb* for 24 h. Supernatant from uninfected RAW264.7 M $\phi$  and PMA-  
1377 treatment were used as negative and positive controls for HIV-1 reactivation,  
1378 respectively. To investigate if supernatant mediated HIV-1 reactivation is  
1379 dependent on the presence of extracellular vesicles (e.g., exosomes), we  
1380 treated *Mtb* infected U937 and RAW264.7 M $\phi$  with an inhibitor of exosome  
1381 secretion (GW4869) for 24 h, followed by supernatant collection and  
1382 reactivation of HIV-1 in U1 **(C and E)**, J-Lat **(D)**, and J1.1 **(F)** cells as  
1383 described earlier. HIV-1 reactivation was measured by p24 (*gag*) qRT-PCR in  
1384 J1.1 cells. Error bars represent standard deviations from the mean. \*\* p<0.01;  
1385 \*\*\* p<0.001; \*\*\*\*p<0.0001. Data are representative of at least two  
1386 independent experiments performed in triplicate.  
1387  
1388

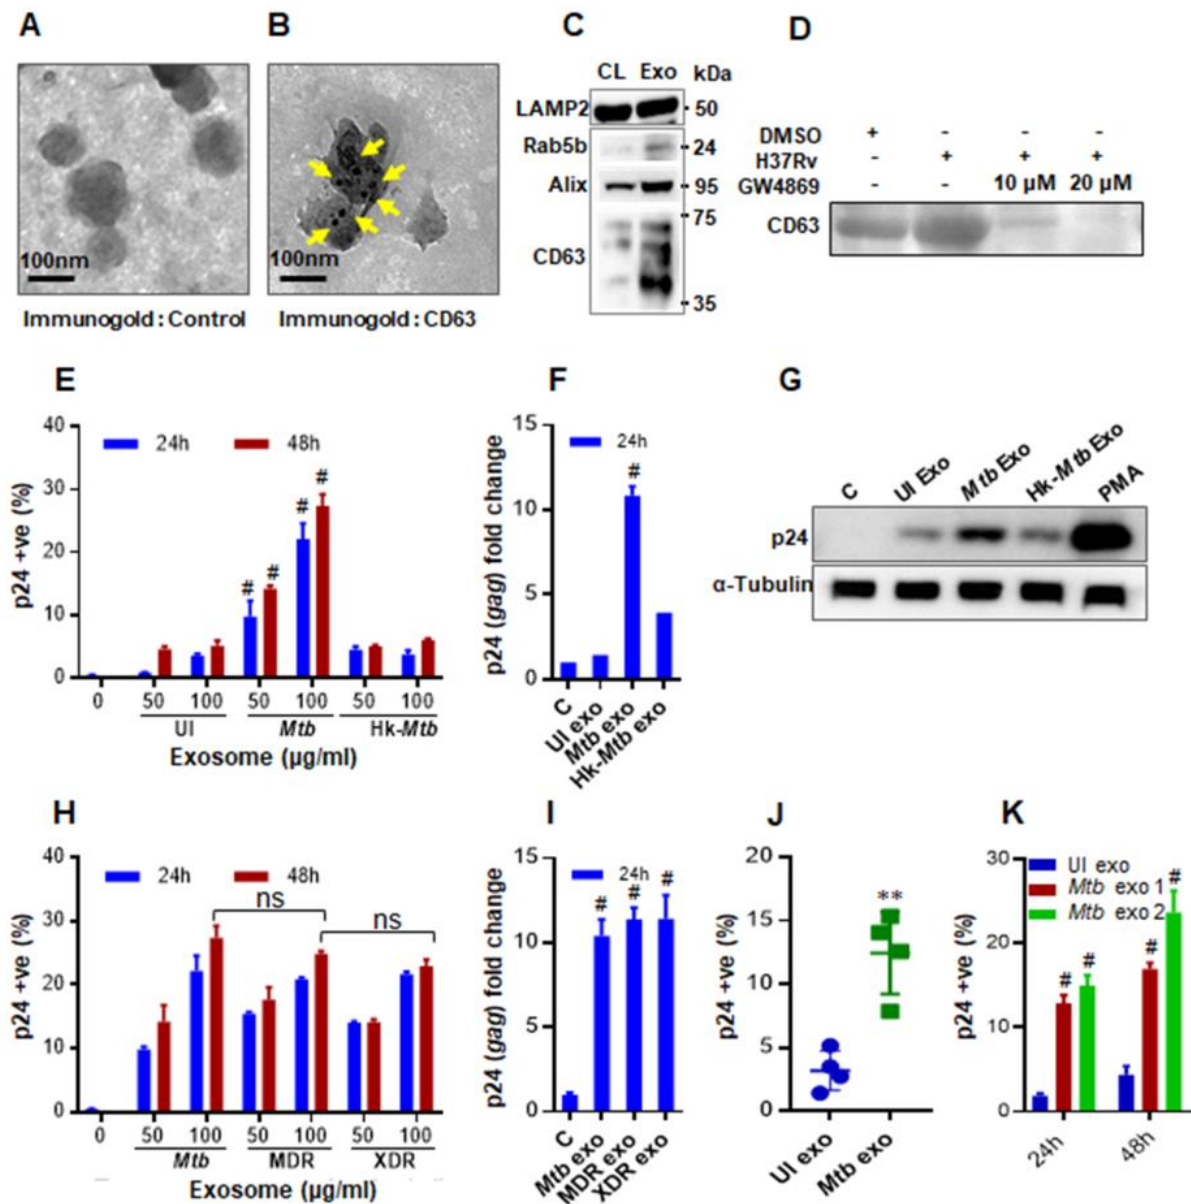

1389

1390 **Fig. 4. Exosomes derived from *Mtb* infected macrophages (Mφ) and mice**

1391 **induce HIV reactivation.** Exosomes were isolated from enriched cell culture

1392 supernatant of *Mtb* infected RAW 264.7 Mφ. Exosomes were purified by using

1393 the ExoQuick precipitation solution and morphologically characterized by

1394 transmission electron microscopy (TEM). **(A)** Control, **(B)** Immunogold

1395 labeling of exosomes using the antibody against exosomes surface marker,

1396 CD63. Scale bar, 100 nm, **(C)** Immuno-blot analysis of LAMP2, Rab5b, Alix

1397 and CD63 in cell extract (CL; 30 μg) and purified exosomes (Exo, 30 μg) from

1398 *Mtb* infected RAW264.7 M $\phi$ , **(D)** Immuno- blot analysis of exosome-specific  
1399 marker CD63 to show dose dependent reduction in exosome production by  
1400 *Mtb* infected RAW 264.7 M $\phi$  upon treatment with GW4869. Exosomes were  
1401 derived from equal number of RAW 264.7 M $\phi$  in each case and equivalent  
1402 volume was loaded in each lane. **(E)** U1 cells were treated with 50 and 100  
1403  $\mu$ g/ml of purified exosomes and HIV-1 reactivation was measured by flow  
1404 cytometry using PE labeled antibody specific to p24 (Gag) antigen at the  
1405 indicated time-points, **(F)** qRT-PCR for *gag* transcript at 24 h post-treatment  
1406 with 100  $\mu$ g/ml of purified exosomes, **(G)** immuno-blot for p24 in the cell lysate  
1407 (50  $\mu$ g) at 24 h post-treatment with 100  $\mu$ g/ml of purified exosomes. CTR and  
1408 UI exo denote HIV-1 reactivation without any treatment or upon treatment with  
1409 exosomes (100  $\mu$ g/ml) derived from uninfected RAW 264.7 M $\phi$ , respectively.  
1410 RAW264.7 M $\phi$  were infected with MDR (Jal-1934) and XDR (Myc431) strains  
1411 for 24 h and exosomes were isolated. U1 cells were treated with exosomes  
1412 and HIV-1 reactivation was monitored at the indicated time by flow cytometry  
1413 using **(H)** PE labeled antibody specific to p24 (Gag) antigen and **(I)** qRT-PCR  
1414 of *gag* transcript. BALB/c mice were infected with 100 CFU of *Mtb* H37Rv or  
1415 were left uninfected. Exosomes were isolated from mouse serum and from the  
1416 lung tissue at 20 weeks post infection using ExoQuick and quantified by micro  
1417 BCA assay. U1 cells were treated with exosomes derived from **(J)** serum (2  
1418 mg/ml) or **(K)** from lungs (*Mtb* exo1 - 100  $\mu$ g/ml, *Mtb* exo2 - 200  $\mu$ g/ml ) and  
1419 HIV reactivation was measured by flow cytometry using fluorescent tagged  
1420 antibody (PE labeled) specific to p24 (Gag) antigen. Error bars represent  
1421 standard deviations from the mean. Statistical analyses were performed using  
1422 two tailed unpaired t-test **(J)**, one-way ANOVA **(F, I)** and two-way ANOVA **(E,**

1423 H, K). ns- non significant; \*\*p<0.01; # p<0.001. Data are representative of at

1424 least two independent experiments performed in duplicate.

1425

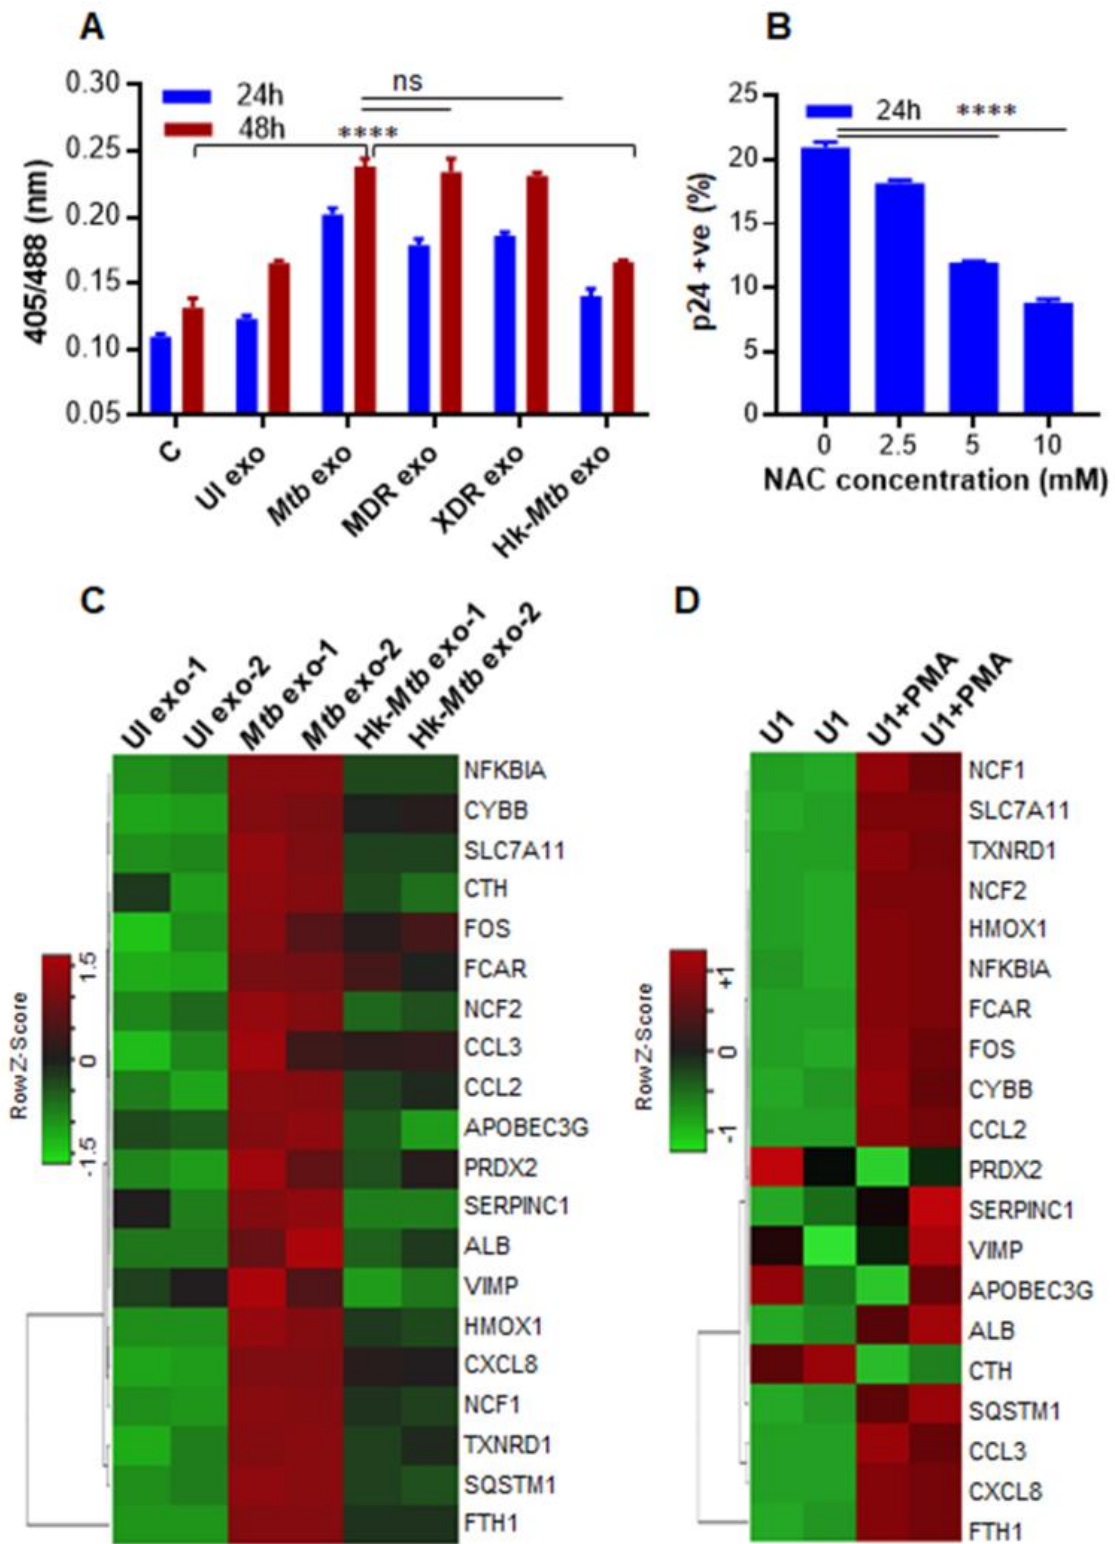

1426  
1427



1428 **Fig. 5. *Mtb* specific exosomes reactivate HIV-1 by inducing oxidative**  
1429 **stress. (A)** RAW264.7 M $\phi$  were infected with *Mtb*, *Hk-Mtb*, Jal-1934 (MDR)  
1430 and MYC431 (XDR) at moi 10. At 24 h p.i., exosomes were isolated from the  
1431 culture supernatant, and 100  $\mu$ g/ml of exosomes were used to treat U1/Grx1-  
1432 roGFP2 for 24 and 48 h. Ratiometric biosensor response was measured by  
1433 flow cytometry. UI exo: denotes exosomes isolated from uninfected  
1434 RAW264.7. **(B)** U1 cells were pre-treated with N-acetyl cysteine (NAC) for 1 h  
1435 at indicated concentrations followed by exposure to *Mtb* specific exosomes  
1436 (100  $\mu$ g/ml) for 24 h. HIV reactivation was measured by flow cytometry using  
1437 fluorescent tagged antibody (PE labeled) specific to p24 (Gag) antigen. Data  
1438 are representative of at least three independent experiments performed in  
1439 triplicate. **(C)** U1 cells were treated with exosomes (100  $\mu$ g/ml) isolated from  
1440 uninfected, *Mtb* infected, and *Hk-Mtb* infected RAW264.7. Total RNA from U1  
1441 cells was isolated after 12 h of exosome treatment, followed by expression  
1442 analysis of 185 genes specific to HIV host response and oxidative stress  
1443 response utilizing NanoString customized gene expression panels. Data were  
1444 normalized by nSolver (NanoString) software. Genes with significant changes  
1445 were selected based on  $p < 0.05$  and fold change  $> 1.5$  between *Mtb* versus UI,  
1446 *Mtb* versus *Hk-Mtb*, *Hk-Mtb* versus UI. Data is displayed as heat maps of  
1447 three groups together. **(D)** Expression profile of HIV host response and  
1448 oxidative stress response in U1 monocytes and U1 macrophages (PMA-  
1449 differentiated). Error bars represent standard deviations from the mean.  
1450 \*\*\*\* $p < 0.0001$  (two-way ANOVA). Data are representative of at least two  
1451 independent experiments performed in duplicate.

1452

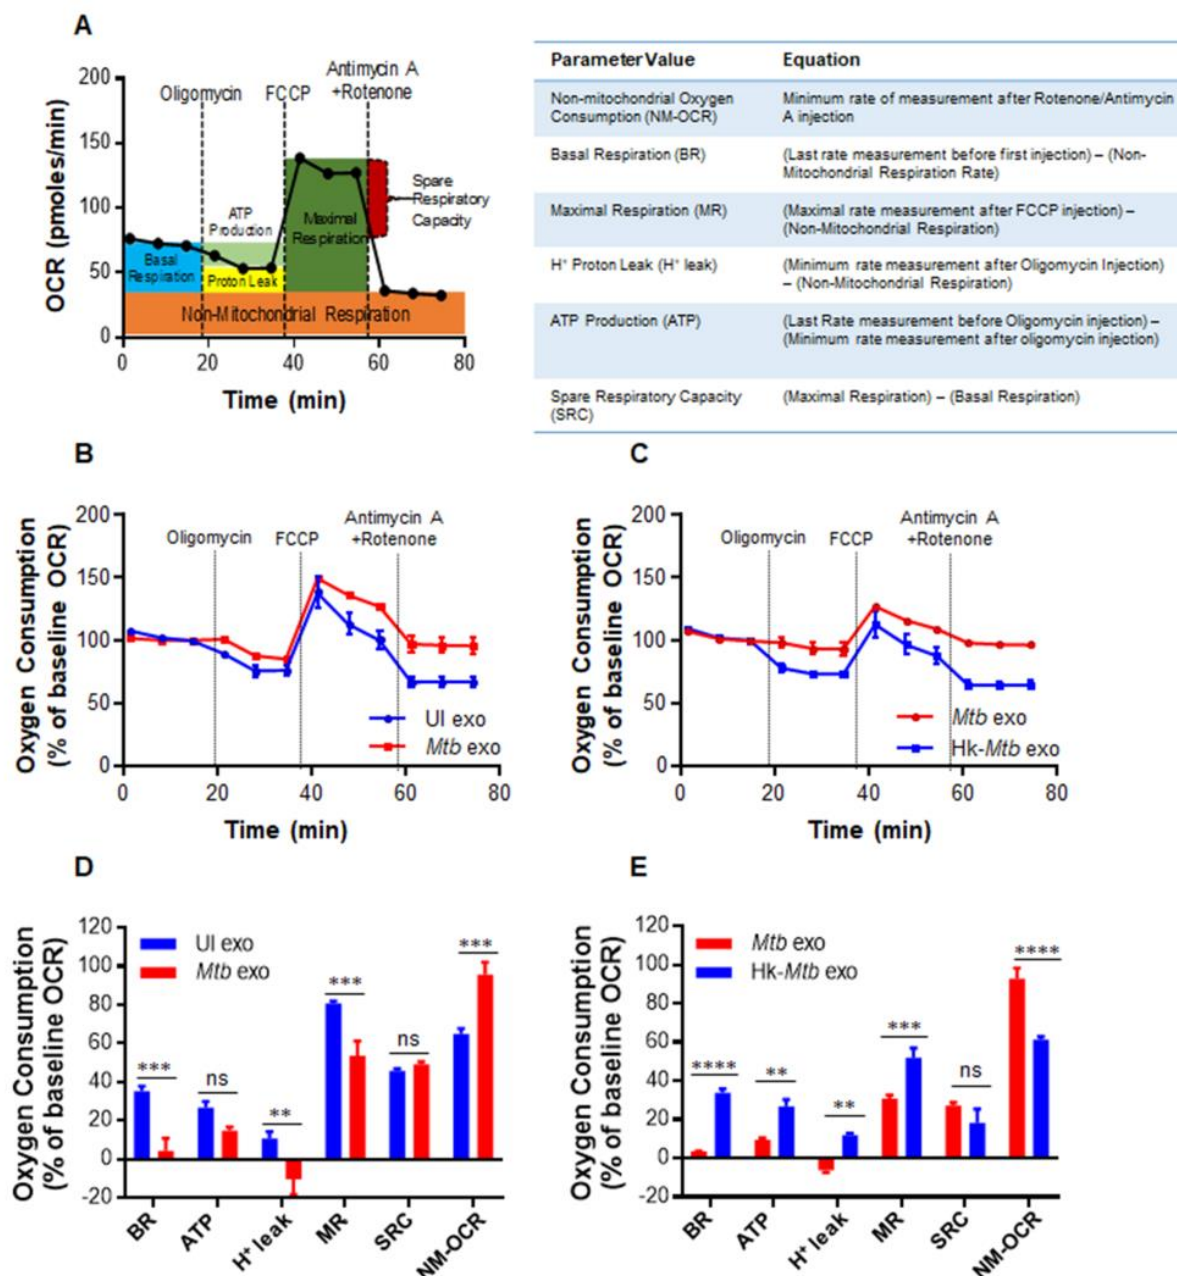

1453

1454 **Fig. 6. *Mtb*-specific exosomes modulate OXPHOS of U1 cells. (A)**

1455 Schematic presentation of Agilent Seahorse XF Cell Mito Stress test profile of

1456 the key parameters of mitochondrial respiration. **(B and C)** RAW264.7

1457 macrophages were infected with *Mtb* and Hk-*Mtb* at moi 10. At 24 h p.i.,

1458 exosomes were isolated from the culture supernatant, and 100 µg/ml of

1459 exosomes were used to treat U1 for 48 h. Respiratory profile of U1 cells on

1460 treatment with exosomes isolated under indicated conditions. U1 exo:

1461 exosomes isolated from uninfected RAW264.7. Respiratory profile was  
1462 measured and expressed as percent of basal oxygen consumption rate  
1463 (%OCR). Oxygen consumption was measured without any inhibitor (basal  
1464 respiration), followed by OCR change upon sequential addition of oligomycin  
1465 (1  $\mu$ M; ATP synthase inhibitor) and cyanide-4  
1466 [trifluoromethoxy]phenylhydrazone (FCCP; 0.25  $\mu$ M), which uncouples  
1467 mitochondrial respiration and maximizes OCR. Finally, respiration was  
1468 completely shut down by inhibiting respiration using antimycin A and  
1469 Rotenone (0.5  $\mu$ M each), inhibit complex III and I, respectively. **(D and E)**  
1470 Various respiratory parameters as outlined in the table of panel A were  
1471 measured using the values obtained from the dataset depicted in panel **(B)**  
1472 and **(C)** and as described in materials and methods. Error bars represent  
1473 standard deviations from the mean. ns- non significant; \*\*p<0.01; \*\*\*p<0.001  
1474 (two tailed unpaired t-test). Data are representative of at least two  
1475 independent experiments performed in triplicate.  
1476

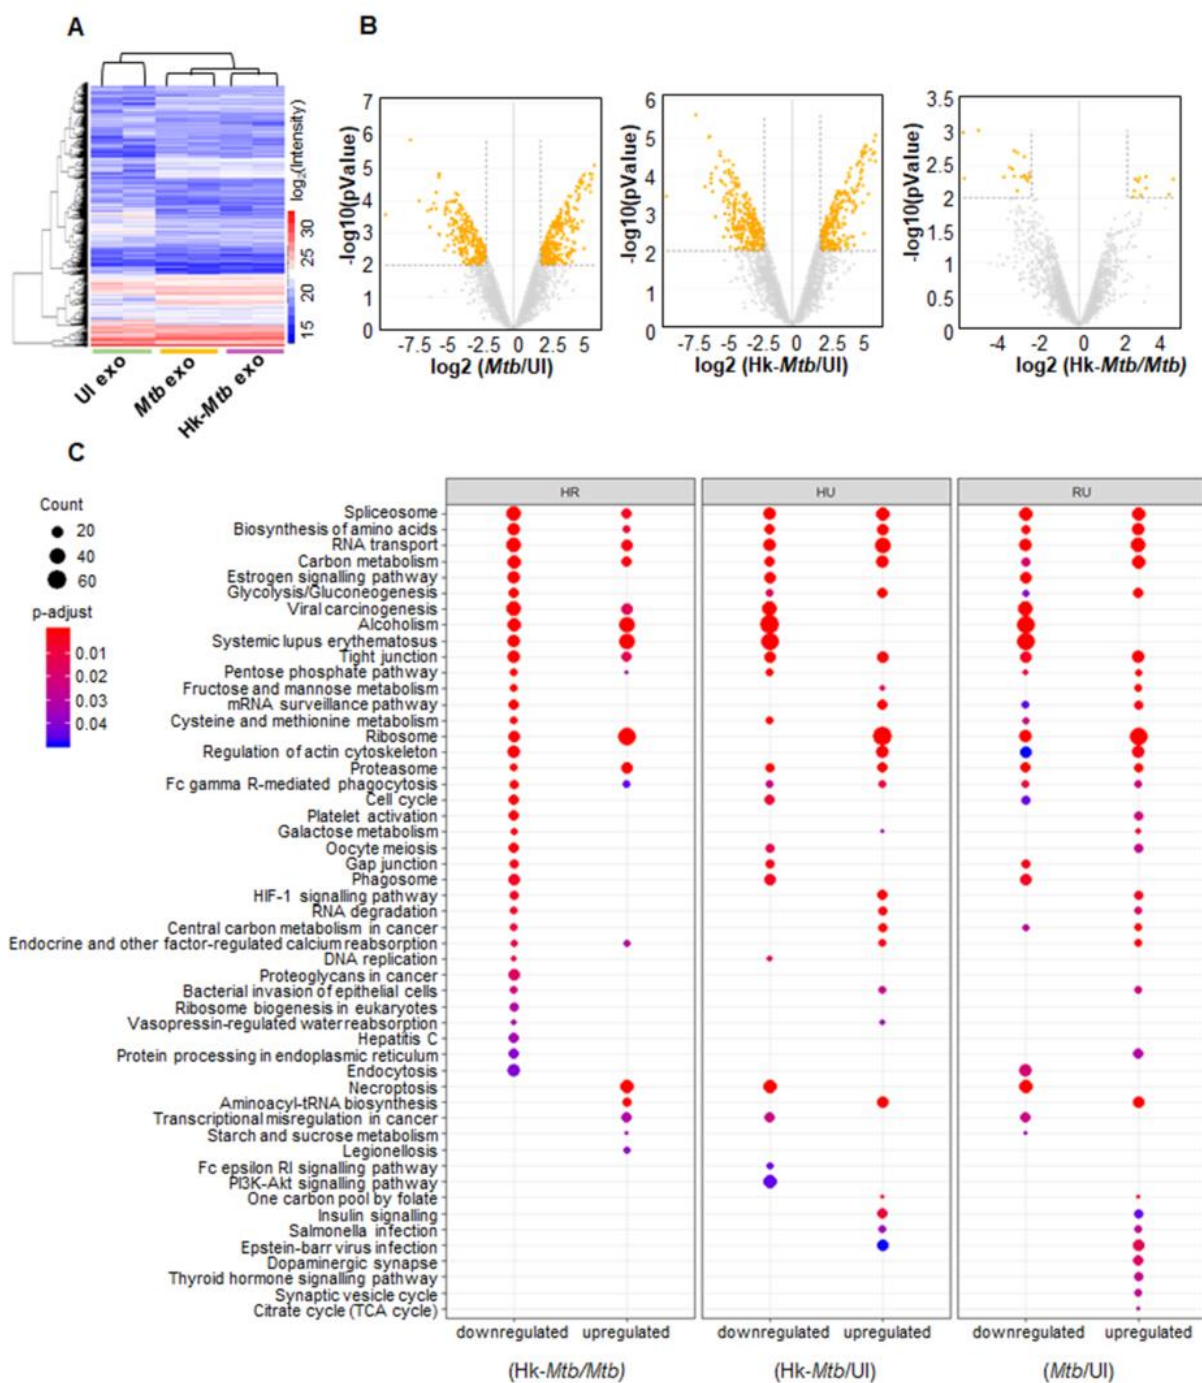

1477

1478 **Fig. 7. Proteomics of *Mtb* specific exosomes by LC-MS/MS. RAW264.7**

1479 *Mφ* were infected with *Mtb* and *Hk-Mtb* at moi 10 or left uninfected. At 24 h

1480 p.i., exosomes were isolated from the culture supernatant for LC-MS/MS. **(A)**

1481 Heat map of differentially expressed proteins of exosomes in three samples.

1482 **(B)** Volcano plots of differentially expressed proteins. Significantly up-

1483 regulated and down-regulated proteins with log2 fold change more than two

1484 are shown as orange dots. **(C)** Enriched KEGG signaling pathways, proteins  
1485 upregulated or downregulated in different comparison groups: (heat killed) Hk-  
1486 *Mtb* versus live *Mtb*, Hk-*Mtb* versus UI (uninfected) and live *Mtb* versus UI  
1487 (uninfected).

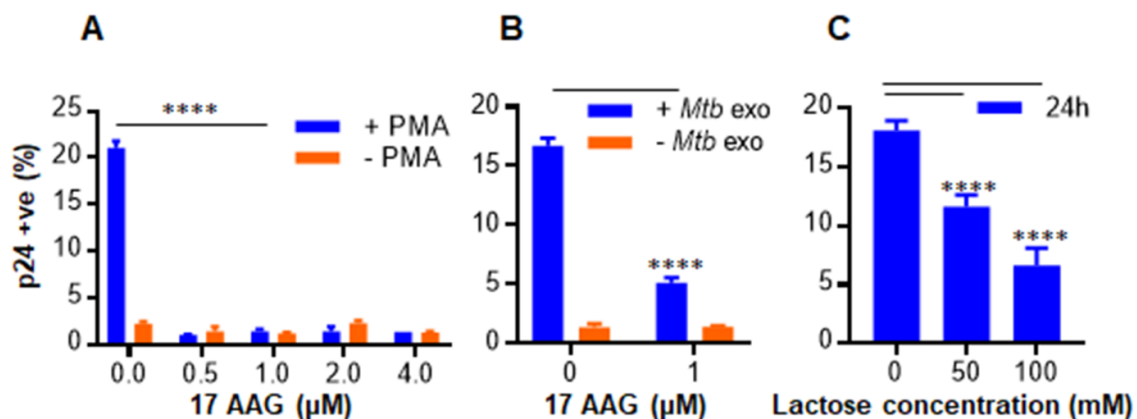

1488

1489 **Fig. 8. Hsp-90 and Galectin inhibitors reverse the exosomes mediated**

1490 **HIV-1 reactivation in U1 cells. (A)** U1 cells were stimulated with 5 ng/ml of

1491 PMA to induce HIV reactivation in presence of indicated concentration of 17-

1492 AAG (Hsp-90 inhibitor). **(B)** U1 cells were treated with 100 µg/ml of *Mtb*

1493 exosomes isolated from RAW264.7 as described earlier and HIV reactivation

1494 was monitored in the presence of indicated concentration of 17-AAG. **(C)** *Mtb*

1495 infected RAW264.7 macrophages were treated with 50 and 100 mM of

1496 lactose (galectins inhibitor) for 24 h and exosomes were isolated. These

1497 exosomes were then used to reactivate HIV-1 from U1 cells. HIV-1

1498 reactivation was measured by flow cytometry using fluorescent tagged

1499 antibody (PE labeled) specific to p24 (Gag) antigen. Error bars represent

1500 standard deviations from the mean. \*p<0.05; \*\*p<0.01; \*\*\* p<0.001;

1501 \*\*\*\*p<0.0001. One-way ANOVA **(C)** and two-way ANOVA **(A, B)**. Data are

1502 representative of at least two independent experiments performed in

1503 duplicate.

1504 **Supplementary Information**

1505

1506 **Mycobacterium tuberculosis reactivates HIV via exosomes mediated**

1507 **resetting of cellular redox potential and bioenergetics**

1508

1509 Priyanka Tyagi<sup>1, 2</sup>, Virender Kumar Pal<sup>1</sup>, Sandhya Srinivasan<sup>3</sup>, and Amit

1510 Singh<sup>1\*</sup>

1511 <sup>1</sup>Department of Microbiology and Cell Biology, Centre for Infectious Disease

1512 Research, Indian Institute of Science (IISc), Bangalore-12

1513 <sup>2</sup>International Centre for Genetic Engineering and Biotechnology (ICGEB),

1514 New Delhi-67

1515 <sup>3</sup>Vproteomics, New Delhi-16

1516

1517 Keywords: Exosomes, glutathione, redox potential, extracellular acidification

1518 rate, oxidative phosphorylation, roGFP

1519

1520

1521 **Supplementary figures:**  
 1522

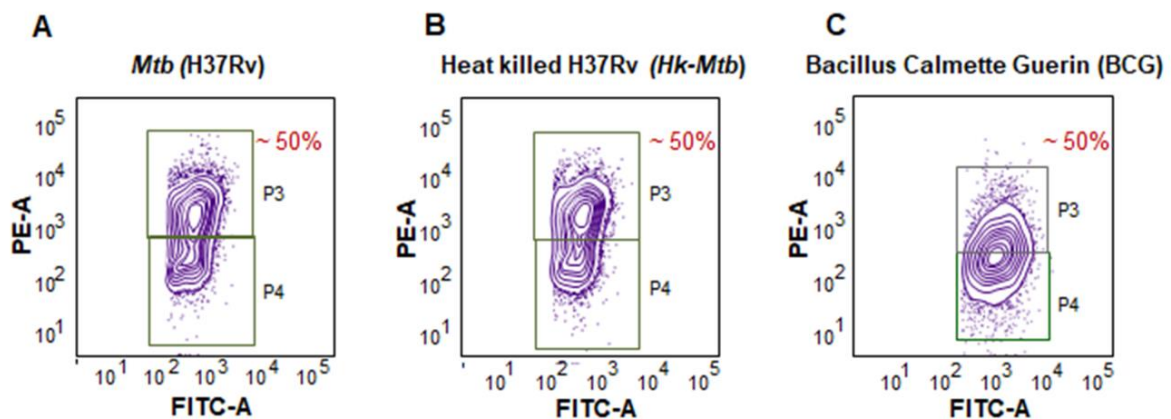

1523

1524 **Fig. S1. *Mtb* H37Rv, Heat killed H37Rv (*Hk-Mtb*), and BCG equally infect**  
 1525 **the U937 Mφ.** PMA differentiated U937/Grx1-roGFP2 were infected with  
 1526 PKH26 labeled bacilli (MOI 10). **(A-C)** Dot plot of U937/Grx1-roGFP2 after  
 1527 infection with **(A)** H37Rv (*Mtb*), **(B)** (*Hk-Mtb*) and **(C)** Bacillus Calmette Guerin  
 1528 (BCG). P3 represents *Mtb* infected U937 cell subpopulation and P4 represent  
 1529 bystander U937 cell subpopulation.

1530

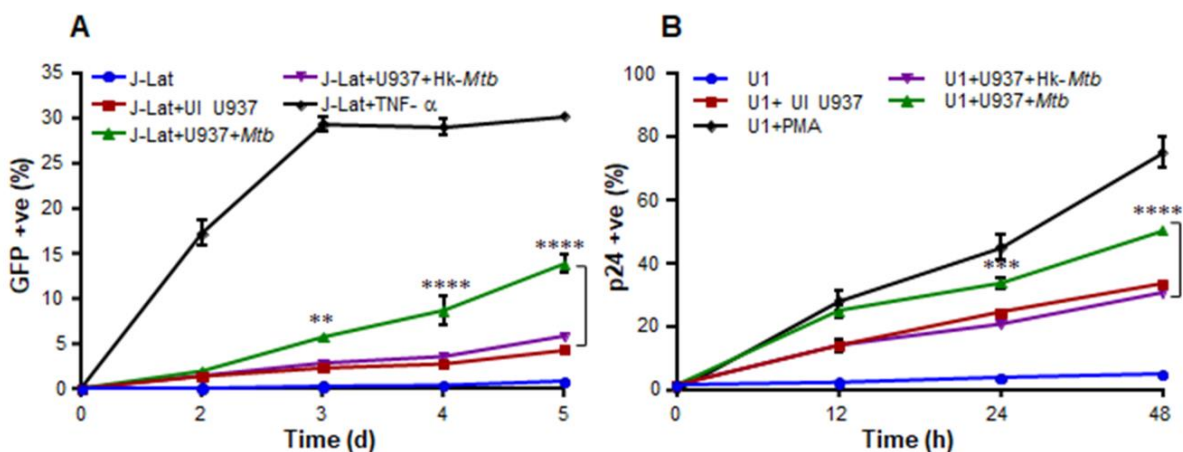

1531

1532 **Fig. S2. *Mtb* infected Mφ reactivates latent HIV-1 from lymphocytes and**  
 1533 **monocytes. (A)** J-Lat T cells are latently infected with the HIV-1 provirus  
 1534 containing green fluorescent protein [GFP] in the genome. Reactivation of  
 1535 HIV-1 can be easily monitored by measuring the increase in GFP

1536 fluorescence using flow cytometer. J-Lat cells were co-cultured with U937 Mφ  
1537 pre-infected with live *Mtb* or *Hk-Mtb* for 4 h and GFP fluorescence was  
1538 monitored at the indicated time points. GFP fluorescence of J-Lat cells treated  
1539 with TNFα (10ng/ml) or left untreated was taken as the measure of  
1540 reactivation or latency, respectively. As an additional control, J-Lat cells were  
1541 also co-cultured with uninfected (UI) U937 Mφ. **(B)** U1 cells (U937 monocytes  
1542 chronically infected with HIV-1), were co-cultured with UI, *Mtb* infected or Hk-  
1543 *Mtb* infected U937 Mφ. At various time points, U1 cells were immuno-stained  
1544 for intracellular HIV p24 (Gag) antigen and fluorescence response was  
1545 measured by flow cytometry. Percent p24 antigen positive U1 cells  
1546 corresponds to percent HIV reactivation upon co-culturing over time. PMA (5  
1547 ng/ml) and U1 cells alone were used as positive and negative control,  
1548 respectively. Error bars represent standard deviations from the mean. \*\*  
1549 p<0.01; \*\*\*p<0.001; \*\*\*\* p<0.0001 (two-way ANOVA). Data are representative  
1550 of at least three independent experiments performed in triplicate.  
1551



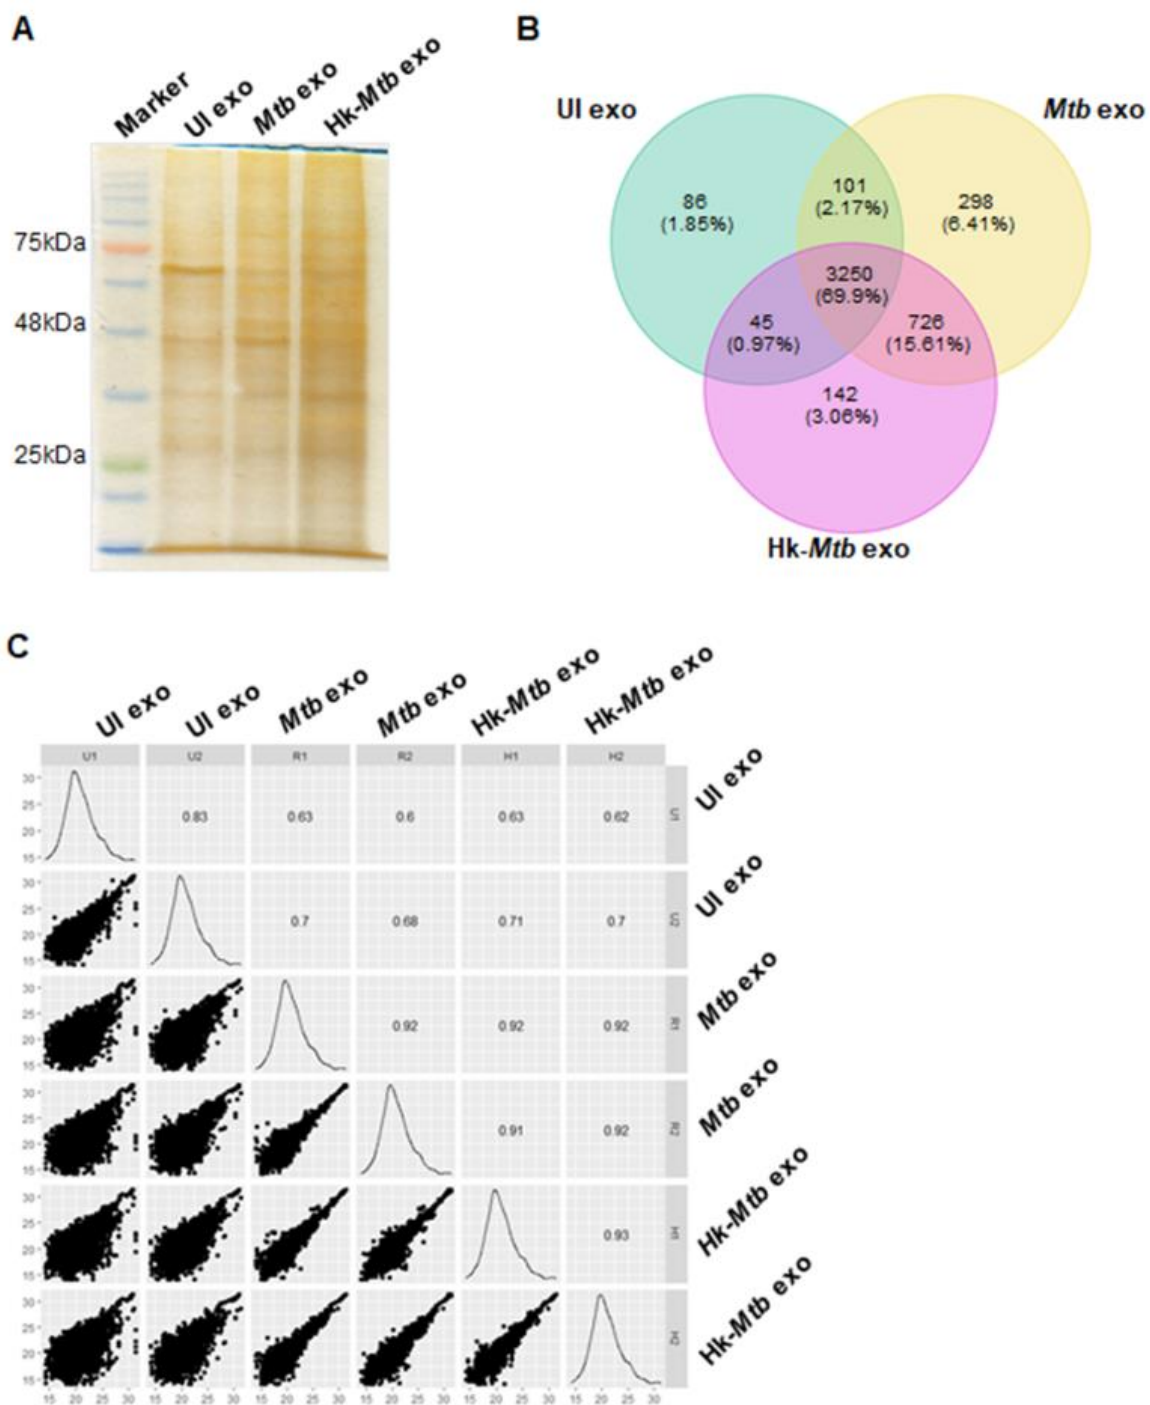

1552

1553 **Fig. S3. Proteomics of *Mtb* specific exosomes by LC-MS/MS. RAW264.7**

1554 Mφ were infected with *Mtb* and Hk-*Mtb* at moi 10 or left uninfected. At 24 h

1555 p.i., exosomes were isolated from the culture supernatant for LC-MS/MS. **(A)**

1556 Silver stained SDS-PAGE gel loaded with 10 μg of total exosomal protein. **(B)**

1557 Venn diagram showing percent overlap between the exosomal proteins

1558 identified by LC-MS/MS among three samples. **(C)** Correlation plot of three  
 1559 exosome samples in duplicate.

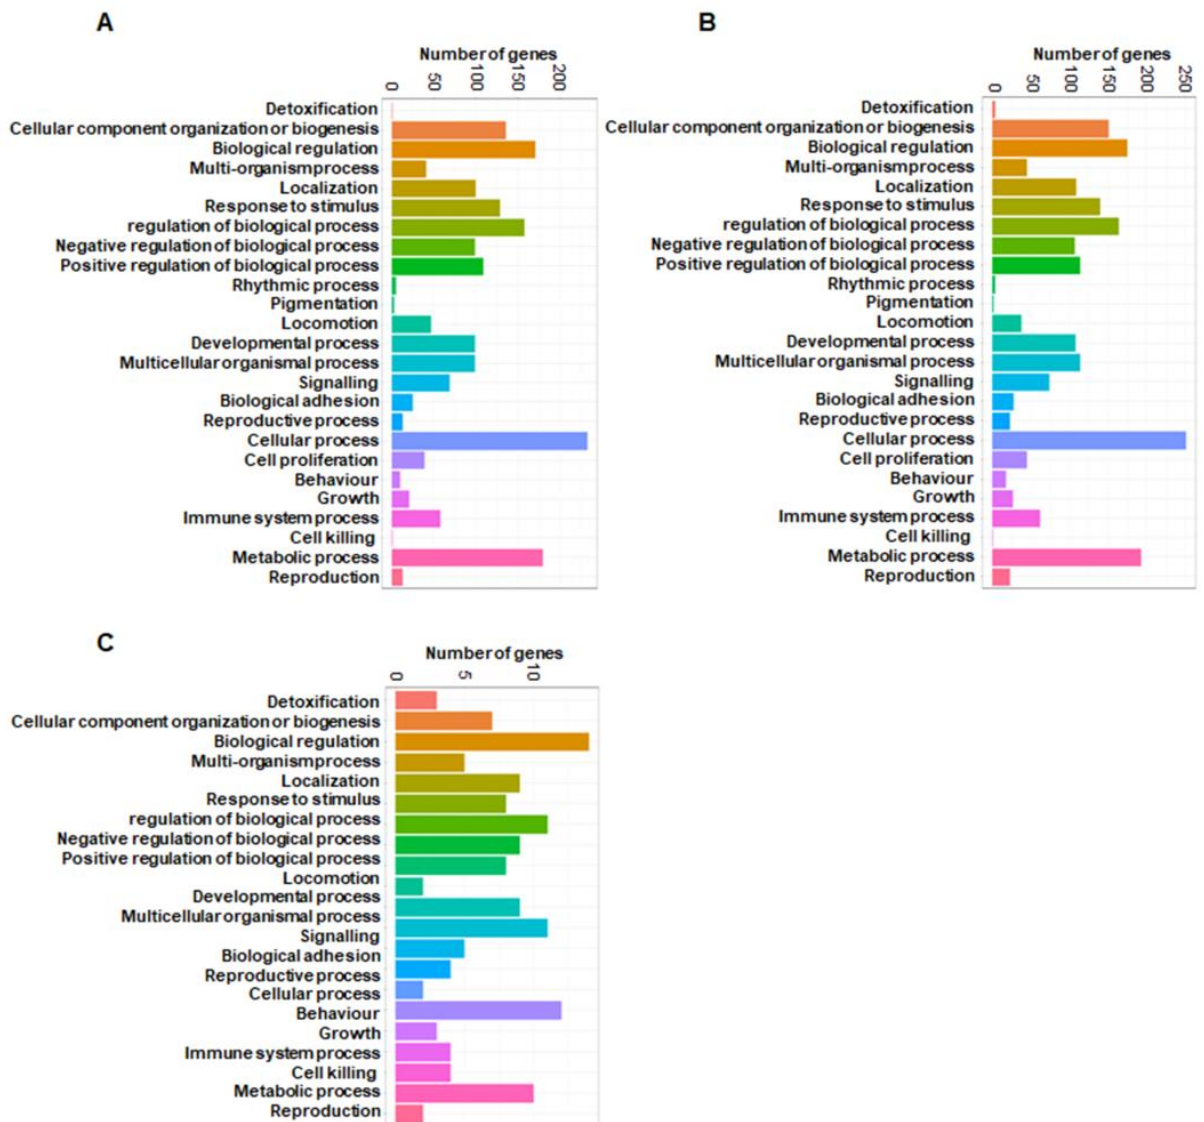

1560

1561 **Fig. S4. Functional classification of differentially expressed proteins of**  
 1562 **exosomes. (A)** Enriched GO terms (biological processes) of differentially  
 1563 expressed proteins in *Mtb* exosomes *versus* UI exosomes. **(B)** Enriched GO  
 1564 terms (biological processes) of differentially expressed proteins in Hk-*Mtb*  
 1565 exosomes *versus* UI exosomes. **(C)** Enriched GO terms (biological  
 1566 processes) of differentially expressed proteins in *Mtb* exosomes *versus* Hk-  
 1567 *Mtb* exosomes.

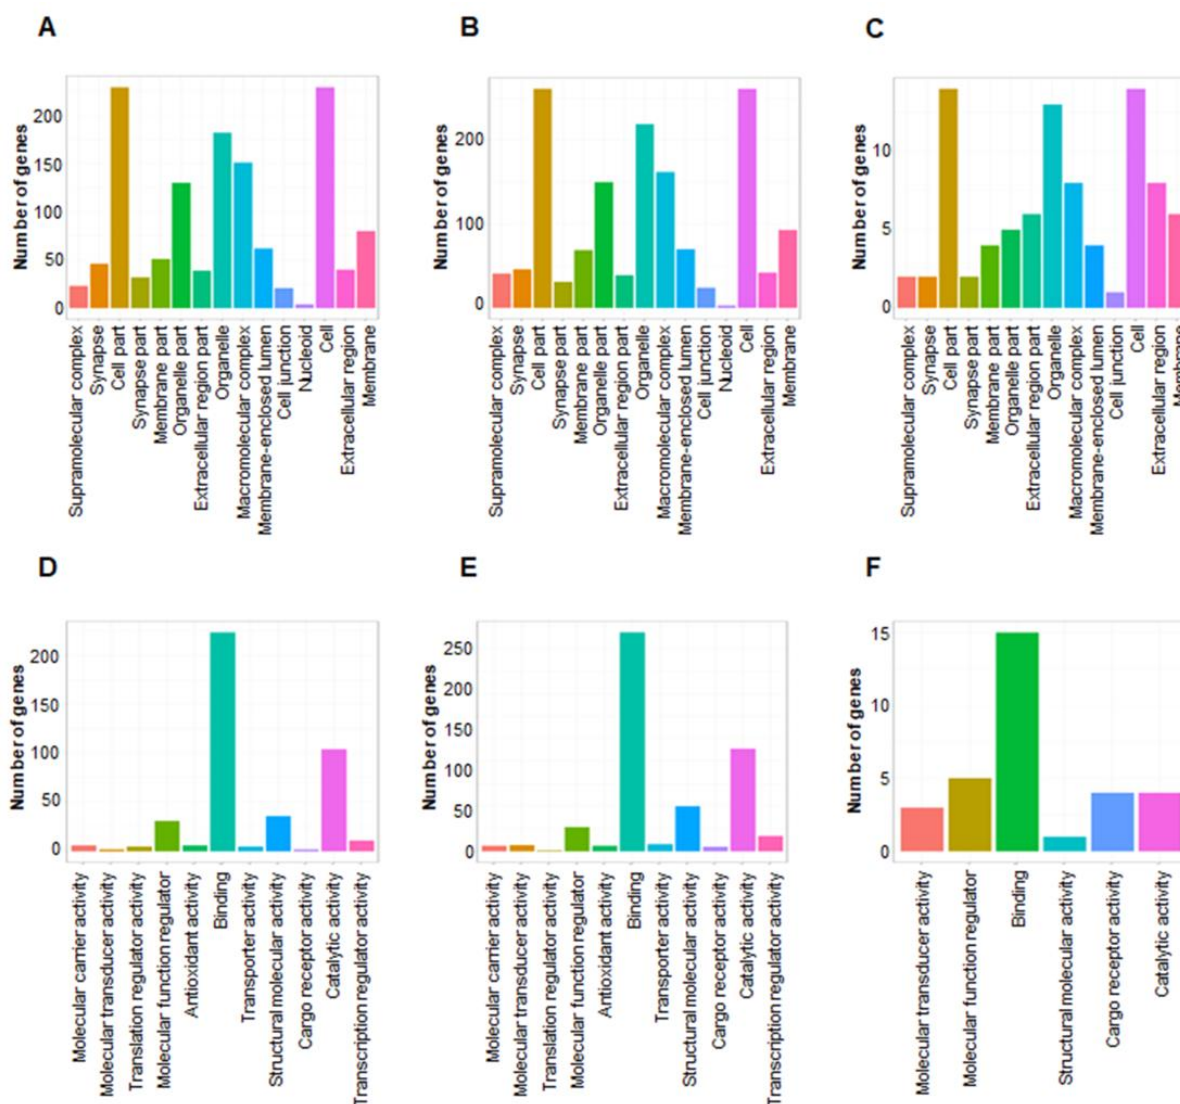

1568

1569 **Fig. S5. Functional classification of differentially expressed proteins of**  
 1570 **exosomes. (A)** Enriched GO terms (Cellular localization) of differentially  
 1571 expressed proteins in *Mtb* exosomes *versus* UI exosomes. **(B)** Enriched GO  
 1572 terms (Cellular localization) of differentially expressed proteins in Hk-*Mtb*  
 1573 exosomes *versus* UI exosomes. **(C)** Enriched GO terms (Cellular localization)  
 1574 of differentially expressed proteins in *Mtb* exosomes *versus* Hk-*Mtb*  
 1575 exosomes. **(D)** Enriched GO terms (Molecular Function) of differentially  
 1576 expressed proteins in *Mtb* exosomes *versus* UI exosomes. **(E)** Enriched GO  
 1577 terms (Molecular Function) of differentially expressed proteins in Hk-*Mtb*  
 1578 exosomes *versus* UI exosomes. **(F)** Enriched GO terms (Molecular function)

1579 of differentially expressed proteins in *Mtb* exosomes versus *Hk-Mtb*  
1580 exosomes.

1581

1582 **Tables**

1583 **Table S1**

1584 **Table S1a.** List of genes used for nCounter Gene Expression Assay.

1585 **Table S1b.** Normalized intensity values of differentially expressed gene in  
1586 nCounter Gene Expression Assay.

1587 **Table S1c.** Normalized intensity values of differentially expressed gene in  
1588 nCounter Gene Expression Assay.

1589

1590 **Table S2.** List of proteins identified in LC/MS-MS of uninfected, live H37Rv  
1591 (*Mtb*) and heat killed H37Rv (*Hk-Mtb*) exosomes.

1592

1593 **Table S3**

1594 **Table S3a.** List of differentially expressed proteins in live H37Rv (*Mtb*) versus  
1595 Uninfected (UI) exosomes shown in volcano plots.

1596 **Table S3b.** List of differentially expressed proteins in heat killed H37Rv (*Hk-*  
1597 *Mtb*) versus Uninfected (UI) exosomes shown in volcano plots.

1598 **Table S3c.** List of differentially expressed proteins in heat killed H37Rv (*Hk-*  
1599 *Mtb*) versus live H37Rv (*Mtb*) exosomes shown in volcano plots.

1600

1601 **Table S4**

1602 **Table S4a.** Biological process Gene ontology (GO) term enrichment analysis  
1603 of live *H37Rv (Mtb)* versus Uninfected (UI) exosome proteins.

1604 **Table S4b.** Cell localisation Gene ontology (GO) term enrichment analysis of  
1605 live *H37Rv* (*Mtb*) versus Uninfected (UI) exosome proteins.

1606 **Table S4c.** Molecular function Gene ontology (GO) term enrichment analysis  
1607 of live *H37Rv* (*Mtb*) versus Uninfected (UI) exosome proteins.

1608

1609 **Table S5**

1610 **Table S5a.** Biological process Gene ontology (GO) term enrichment analysis  
1611 of heat killed *H37Rv* (*Hk-Mtb*) versus Uninfected (UI) exosome proteins.

1612 **Table S5b.** Cell localisation Gene ontology (GO) term enrichment analysis of  
1613 heat killed *H37Rv* (*Hk-Mtb*) versus Uninfected (UI) exosome proteins.

1614 **Table S5c.** Molecular function Gene ontology (GO) term enrichment analysis  
1615 of heat killed *H37Rv* (*Hk-Mtb*) versus Uninfected (UI) exosome proteins.

1616

1617 **Table 6**

1618 **Table S6a.** Biological process Gene ontology (GO) term enrichment analysis  
1619 of live *H37Rv* (*Mtb*) versus Heat killed *H37Rv* (*Hk-Mtb*) exosome proteins.

1620 **Table S6b.** Cell localisation Gene ontology (GO) term enrichment analysis of  
1621 live *H37Rv* (*Mtb*) versus Heat killed *H37Rv* (*Hk-Mtb*) exosome proteins.

1622 **Table S6c.** Molecular function Gene ontology (GO) term enrichment analysis  
1623 of live *H37Rv* (*Mtb*) versus Heat killed *H37Rv* (*Hk-Mtb*) exosome proteins.

1624

1625 **Table S7.** KEGG pathway enrichment analysis of heat killed *H37Rv* (H)  
1626 exosomes versus live *H37Rv* (R) exosomes, heat killed *H37Rv* (H) exosomes  
1627 versus Uninfected (U) exosomes, live *H37Rv* (R) versus Uninfected (U)  
1628 exosome proteins.
